# **Adult influence on juvenile phenotypes by stage-specific pheromone production**

Michael S. Werner<sup>1,2</sup>, Marc H. Claaßen<sup>1,2</sup>, Tess Renahan<sup>1,2</sup>, Mohannad Dardiry<sup>1</sup>, and Ralf. J. Sommer<sup>1\*</sup>

<sup>1</sup>Department of Evolutionary Biology, Max Planck Institute for Developmental Biology, 72076 Tübingen, Germany

<sup>2</sup>These authors contributed equally

\*Corresponding author: [ralf.sommer@tuebingen.mpg.de](mailto:ralf.sommer@tuebingen.mpg.de)

1 **Summary**

2

3 Many animal and plant species respond to high or low population densities by phenotypic  
4 plasticity. To investigate if specific age classes and/or cross-generational signaling affect(s)  
5 phenotypic plasticity, we developed a dye-based method to differentiate co-occurring nematode  
6 age classes. We applied this method to *Pristionchus pacificus*, which develops a predatory  
7 mouth form to exploit alternative resources and kill competitors in response to high population  
8 densities. Remarkably, only adult, but not juvenile, crowding induces the predatory morph in  
9 other juveniles. Profiling of secreted metabolites throughout development with HPLC-MS  
10 combined with genetic mutants traced this result to the production of adult-specific pheromones.  
11 Specifically, the *P. pacificus*-specific di-ascaroside#1 that induces the predatory morph exhibits  
12 a binary induction in adults, even though mouth form is no longer plastic in adults. This cross-  
13 generational signaling between adults and juveniles may serve as an indication of rapidly  
14 increasing population size. Thus, phenotypic plasticity depends on critical age classes.

15

16

17

18

19

20

21

22

23

24

25 **Keywords:** Phenotypic plasticity, population density, *Pristionchus pacificus*, *Caenorhabditis*  
26 *elegans*, nematode derived modular metabolites (NDMMs)

## 27 Introduction

28 Population density is an important ecological parameter, with higher densities corresponding to  
29 increased competition for resources (Hastings, 2013). In addition to density-dependent selection  
30 (MacArthur, 1962; Travis et al., 2013), which operates on evolutionary time scales, some  
31 organisms can respond dynamically to population density through phenotypic plasticity. For  
32 example, plants can sense crowding by detecting the ratio of red (chlorophyll absorbing) to far  
33 red (non-absorbing) light, and respond by producing higher shoots (Dudley and Schmitt, 2015).  
34 Locusts undergo solitary to swarm (i.e. gregarious) transition, and aphids can develop wings,  
35 both as results of increased physical contact (Pener and Simpson, 2009; Simpson et al., 2001;  
36 Slogget and Weisser, 2004). Intriguingly, population density can also have cross-generational  
37 effects. For example, adult crowding of the desert locust *Schistocerca gregaria* (Maeno and  
38 Tanaka, 2008; Simpson and Miller, 2007) and migratory locust *Locusta migratoria* (Chen et al.,  
39 2015; Hamouda et al.) also influences the egg size, number, and morphology of their progeny;  
40 and high population densities of red squirrels elicit hormonal regulation in mothers to influence  
41 faster-developing offspring (Ben Dantzer et al., 2013). In many species, population density and  
42 cross-generational signaling are detected through pheromones, however the precise nature,  
43 mechanisms of induction, age-specificity, and exact ecological role are not well understood.

44 Nematodes are a powerful model system to investigate the mechanisms of density-  
45 dependent plasticity because many small molecule pheromones that affect plastic phenotypes  
46 have been characterized (Butcher, 2017; Butcher et al., 2007; Reuss et al., 2012). For example,  
47 in the model organism *Caenorhabditis elegans*, high population densities induce entry into a  
48 stress-resistant dormant 'dauer' stage (Fielenbach and Antebi, 2008). The decision to enter  
49 dauer was revealed to be regulated by a family of small molecule nematode-derived modular  
50 metabolites (NDMMs) called ascarosides that act as pheromones (Butcher et al., 2007; 2008;  
51 Jeong et al., 2005). Ascarosides consist of an ascarylose sugar with a fatty acid side chain and

52 modular head and terminus groups (Figure 1A). The level and composition of ascarosides were  
53 later shown to be dependent on sex (Chasnov et al., 2007; Izrayelit et al., 2012) and  
54 development (Kaplan et al., 2011), although it is thought that dauer can be induced by all  
55 developmental stages (Golden and Riddle, 1982). Subsequent studies revealed that specific  
56 NDMMs also regulate other life history traits, such as mating (Chasnov et al., 2007; Izrayelit et  
57 al., 2012), social behavior (Srinivasan et al., 2012) and developmental speed (Ludewig et al.,  
58 2017). Although NDMMs are broadly conserved (Choe et al., 2012; Dong et al., 2018; Markov et  
59 al., 2016), inter- and intraspecific competition have driven the evolution of distinct response  
60 regimes for the same phenotypes (Bose et al., 2014; Choe et al., 2012; Diaz et al., 2014; Falcke  
61 et al., 2018; Greene et al., 2016). In addition, more complex structures have been observed that  
62 affect distinct plastic phenotypes (Bose et al., 2012).

63 In *Pristionchus pacificus*, a soil-associated nematode that is reliably found on scarab  
64 beetles (Figure 1A)(Herrmann et al., 2006; 2007; Sommer and McGaughran, 2013), an  
65 ascaroside dimer (dasc#1) that is not found in *C. elegans* regulates the development of a  
66 predatory mouth form (Bento et al., 2010a; Bose et al., 2012; Sommer et al., 2017). Mouth-form  
67 plasticity represents an example of a morphological novelty that results in predatory behavior to  
68 exploit additional resources and kill competitors. Specifically, adult *P. pacificus* exhibit either a  
69 narrow stenostomatous (St) mouth (Figure 1B), which is restricted to bacterial feeding, or a wide  
70 eurystomatous (Eu) mouth with an extra denticle (Figure 1C), which allows for feeding on  
71 bacteria and fungi (Sanghvi et al., 2016), and predation on other nematodes (Wilecki et al.,  
72 2015). This type of phenotypic plasticity is distinct from direct vs. indirect (dauer) development  
73 because it results in two alternative life history strategies in the adult (for review see Sommer &  
74 Mayer, 2015). Recent studies in *P. pacificus* have begun to investigate the dynamics and  
75 succession of nematodes on decomposing beetle carcasses to better understand the ecological  
76 significance of mouth-form plasticity (Meyer et al., 2017). These studies revealed that on a

77 carcass (Figure 1D), *P. pacificus* exits the dauer diapause to feed on microbes, and then re-  
78 enters dauer after food sources have been exhausted, displaying a 'boom-and-bust' ecology  
79 (Meyer et al., 2017; Sommer and McGaughan, 2013). Presumably different stages of this  
80 succession comprise different ratios of juveniles and adults, and recognizing the age-structure  
81 of a population as a juvenile could provide predictive value for adulthood. However, it is  
82 unknown whether the mouth-form decision is sensitive to crowding by different age classes.  
83 More broadly, while age classes are known to be important for population growth and density-  
84 dependent selection {Hastings:2013dn, Charlesworth:1994ww, Charlesworth:1970ks}, their role  
85 in phenotypic plasticity has thus far been largely unexplored.

86         While nematodes have many experimental advantages, including easy laboratory culture  
87 and advanced genetic, genomic, and the aforementioned chemical tools, their small size has  
88 made investigations at the organismal level and in experimental ecology challenging. For  
89 example, no *in vivo* methodologies are currently available to label distinct populations without  
90 the need for transgenics, which is only available in select model organisms such as *C. elegans*,  
91 *P. pacificus*, and some of their relatives. Here, we combine a novel dye-staining method with the  
92 first developmental pheromone profiling in *P. pacificus* to study potential effects of age on  
93 density-dependent plasticity. This vital-dye method allows tracking adults with juveniles, or  
94 juveniles with juveniles, and can be applied to any nematode system that can be cultured under  
95 laboratory conditions. In contrast to dauer, we found that mouth form is strongly affected by  
96 cross-generational signalling. Specifically, only adult crowding induces the predatory morph,  
97 which is controlled by adult-specific pheromones.

98

99

100

101

102 **Results**

103

104 **A vital dye method for labeling nematode populations**

105 To directly test if different age groups of nematodes influence plastic phenotypes, we required  
106 two synchronized populations to co-habit the same space, yet still be able to identify worms  
107 from different age groups. To do so, we developed a dye-staining methodology to robustly  
108 differentiate between nematode populations. After trying several vital dyes, we identified that  
109 Neutral Red (Thomas and Lana, 2008) and CellTracker Green BODIPY (Thermo) stain  
110 nematode intestines brightly and specifically to their respective channels (Figures 2A-E and S1).  
111 These dyes stain all nematodes tested including *C. elegans* (Figure S2) and dauer larvae  
112 (Figure S3A,B). They also last more than three days (Figure S3C-G), allowing long-term  
113 tracking of mixed nematode populations. Importantly, neither Neutral Red nor CellTracker  
114 Green staining affects viability, developmental rate, or the formation of specific morphological  
115 structures, such as *P. pacificus* mouth form (Figure S4). Thus, Neutral Red and CellTracker  
116 Green allow specific labeling of worm populations to study age-dependent effects on  
117 phenotypes.

118

119 **Adult but not juvenile crowding induces the predatory mouth form in *P. pacificus***

120 To assess potential intra- or inter-generational influence on *P. pacificus* mouth form we stained  
121 juveniles of the highly St strain RSC017 with Neutral Red, and added an increasing number of  
122 CellTracker Green-stained RSC017 adults or juveniles (Figure 2F, 3A). Three days later we  
123 phenotyped red animals that had developed into adults, but showed no green staining. To  
124 ascertain potential differences between adding juveniles or adults, we performed a binomial  
125 regression on Eu count data from multiple independent biological replicates ( $n > 3$ ), with age and  
126 number of individuals added as fixed effects (Transparent Methods, Table S1). We observed a

127 significant increase in Eu worms in response to adults, but not juveniles ( $p=2.59 \times 10^{-2}$ ; for  
128 display summed percents are shown in Figure 3B,C). Almost half (48%) of the population  
129 developed the Eu mouth form with just 500 adult animals, which is a greater than 50-fold  
130 induction compared to side-by-side controls (Figure 3B,C). We were also curious if dauers,  
131 which have a thickened cuticle and represent a distinct stage in the boom-and-bust life cycle of  
132 nematodes, could still respond to adults. Indeed, the same trend that was observed with  
133 juveniles was seen with dauers ( $p=2.96 \times 10^{-3}$ ), albeit to a more muted extent (Figure 3D,E).  
134 Specifically, with a total of 200 dauers and 500 adults, 25.7% of dauers become Eu, whereas  
135 only 1.8% of dauers become Eu on a plate containing 700 dauers (and no adults) (Figure 3D).  
136 Collectively, these data indicate that adult crowding specifically induces the Eu mouth form.

137 Even though we did not detect a mouth-form switch in large populations of J2s or  
138 dauers, and food was still visible on plates containing the most animals (500 adults and 200  
139 juveniles), we could not completely rule out the possible effect of food availability on mouth  
140 form. As a proxy for starvation, we conducted assays with greatly increased numbers of  
141 juveniles from 1,000 to 10,000 that would rapidly deplete bacterial food. We noticed a stark cliff  
142 in the fraction of juveniles that reach adulthood at 4,000-5,000 animals, arguing that food is a  
143 limiting resource at this population density (Figure 3F). Importantly however, in these plates we  
144 still did not see a shift in mouth form (Figure 3G) ( $p=0.99$ , binomial regression, Table S1). With  
145 an overwhelming 10,000 worms on a plate, 5.8% were Eu, compared to 48% in the presence of  
146 only 500 adults. While longer-term starvation may yet have an impact on mouth form, under our  
147 experimental conditions it appears to be negligible.

148

#### 149 **Adult but not juvenile secretions induce the Eu mouth form**

150 As mouth-form plasticity in *P. pacificus* is regulated by nematode-derived modular metabolites  
151 (NDMMs)(Bose et al., 2012), we wondered if the difference between adults and juveniles

152 resulted from differences in secreted NDMMs. To test this hypothesis we added secretions from  
153 adult or juvenile worms to RSC017 (highly St) juveniles. We found that adult secretions from  
154 both the laboratory strain RS2333 (highly Eu) and RSC017 led to a significant increase in the Eu  
155 morph relative to juvenile secretions ( $p=5.27 \times 10^{-6}$ ,  $1.33 \times 10^{-3}$ , respectively, Fisher's exact  
156 test)(Figure 4). To confirm the effect was caused by ascaroside pheromones, we exposed  
157 RSC017 juveniles to supernatant from a *daf-22.1;22.2* double mutant, which exhibits virtually no  
158 ascaroside production in both *C. elegans* and *P. pacificus* (Golden and Riddle, 1985; Markov et  
159 al., 2016). Again, juvenile secretion had no impact on Eu frequency, but in contrast to wild-type  
160 supernatants, we observed no significant increase in Eu frequency with adult secretions  
161 ( $p=0.8324$ , Fisher's exact test, Figure 4). Thus, adult-specific NDMMs induce development of  
162 the Eu mouth form.

163

#### 164 **Developmental-staged NDMM profiles reveal adult-specific synthesis of dasc#1**

165 Next, we investigated whether the difference between adult and juvenile pheromones is one of  
166 dosage, or of identity. To answer this question and verify age-specific differences in  
167 pheromones, we profiled *P. pacificus* NDMM levels in two strains and at three time points  
168 throughout development. We used RS2333 and RSC017 and measured the exo-metabolomes  
169 of juvenile stage 2 (J2s, 24 hrs), J3s (48 hrs) and J4/adults (72 hrs) from a constant culture with  
170 excess OP50 bacterial food (Figures 5A,B, S5, Materials and methods). To assess potential  
171 differences in pheromone levels we performed a linear regression with the area under the curve  
172 for each NDMM (aoc) (Figure S5) as the response variable. Stage and strain were modeled as  
173 fixed effects, and because we performed separate regression analyses for each pheromone, we  
174 adjusted the resulting  $p$  values for multiple testing using false discovery rate (FDR)(see Table  
175 S2 for  $p$  and  $FDR$  values between stage and strain). We observed that there was a significant  
176 affect of developmental stage on the levels of *ascr#9*, *ascr#12*, *npar#1*, and *dasc#1*, and that



177 ubas#1 and #2 are strain and stage specific (FDR<0.05). Interestingly, dasc#1 is the most  
178 potent known Eu-inducing compound when tested as a single synthesized compound, while  
179 npar#1 is both Eu- and dauer-inducing (Figure 5C,D,F-I) (Bose et al., 2012). Closer inspection  
180 revealed dasc#1, npar#1, and ascr#9 increase throughout development in both strains, and  
181 dasc#1 peaks in adults in RS2333 ( $p < 0.05$ , student's two-tailed  $t$ -test between 72 hrs and 24  
182 hrs for each NDMM in both strains, and also 72 hrs and 48 hrs for dasc#1 in RS233, Table S3).  
183 Intriguingly, the trajectory of dasc#1 appeared binary in both strains (Figure 5F,G). In fact our  
184 statistical model for dasc#1 fits better if we assume cubic rather than linear growth  
185 ( $\Delta AIC = 3.958$ ). In contrast, ascr#9, which was also statistically up-regulated but does not affect  
186 known plastic phenotypes (Bose et al., 2012), displays a more gradual increase in both strains  
187 (Figure 5E,J,K), and the model fits better with linear growth ( $AIC_{\text{linear}} - AIC_{\text{cubic}} = -1.208$ ).  
188 Meanwhile, the trajectory of npar#1 appears strain-specific (Figure 5H,I). Hence the mode of  
189 induction is NDMM-specific, and the kinetics of production may be related to their roles in  
190 phenotypic plasticity.

191 In principle, the increase in abundance of certain pheromones could be a result of a  
192 concomitant increase in body mass, however several observations indicate more targeted  
193 regulation. First, no other compounds were significantly different in our linear model. Second, an  
194 analysis of previously published RNA-seq data (Baskaran et al., 2015) reveals the increase in  
195 NDMM abundance corresponds to an increase in transcription of the thiolase *Ppa-daf-22.1*  
196 (Figure S6), the most downstream enzyme in the  $\beta$ -oxidation pathway of ascaroside synthesis.  
197 Third, pasc#9 and pasc#12 actually exhibit a peak in abundance at the 48 hr/J3 time point,  
198 rather than in 72 hrs/adults. Finally, we profiled the endo-metabolome of eggs, and found  
199 appreciable amounts of ascr#1, #9, #12, and pasc#9, but little to no traces of other ascaroside  
200 derivatives (Figure S5C), suggesting age-specific synthesis rather than release. Together, these  
201 results suggest that the observed increase in ubas#1 and #2, ascr#9, npar#1, and dasc#1 over

202 time corresponds to age-specific production. The observation that dasc#1 is produced  
203 specifically during the juvenile-to-adult transition is especially intriguing because adults are no  
204 longer able to switch mouth forms, hinting at cross-generational signaling.

205

## 206 **Discussion**

207 Here, we introduce a novel dye-based method that allowed us to assess cross-generational  
208 influence on mouth form. Our results demonstrate adult crowding induces the Eu predatory  
209 morph, and that this effect is a result of age-specific pheromones. In doing so, we provide the  
210 first multi-stage time series of pheromone production in *P. pacificus*, which shows that dasc#1  
211 exhibits a surprising 'off-on' switch-like induction pattern. Collectively, our results argue that  
212 adults represent a critical age group (Charlesworth, 1972) in nematode populations.

213 Our developmental profiling revealed an increase in two NDMMs that affect plastic  
214 phenotypes. The observation that this trend mirrors the transcriptional regulation of enzymes  
215 involved in NDMM synthesis argues that the stage-dependent increase is not simply a result of  
216 an increase in body mass, but rather that these molecules are programmed for stage-specific  
217 induction. The binary 'off-on' kinetics might reflect a population level feedback loop, such that  
218 the production of density-sensing pheromones is based on a threshold level of previously  
219 produced pheromones. It is also worth noting that while npar#1 is the major dauer-inducing  
220 pheromone in *P. pacificus* (Bose et al., 2012), we did not observe dauers in any experimental  
221 setup described herein. Thus, it seems that mouth-form phenotype is the first-level plastic  
222 response to population density. Presumably higher concentrations are required for dauer  
223 induction, reflecting a calculated response strategy depending on the level of crowding or  
224 duration of starvation. Interestingly, the effect of adult supernatants was noticeably less (23%-  
225 26% Eu) than of adult worms (up to 48% with only 500 adults). It is difficult to compare the  
226 amount of pheromone concentrations between experiments, but presumably worms in the vital-

227 dye assay experienced a greater local concentration as they were in direct physical contact with  
228 each other, compared to worms in the supernatant assay.

229         Among the many environmental influences on mouth form (Werner et al., 2017),  
230 population density and starvation are perhaps the most ecologically relevant. However, teasing  
231 apart these two factors has proven difficult (Bento et al., 2010b). Here, we demonstrate that  
232 while a strong shift is observed with adult-specific pheromones, no such effect was seen under  
233 limited resource conditions. Thus, age-specific crowding is sufficient to induce the Eu mouth  
234 form. Nevertheless, this does not preclude that long-term starvation could also have an effect.  
235 Determining the relative contributions of these factors to mouth form will be important to better  
236 understand the sophisticated ecological response strategies of *P. pacificus*, nematodes, and  
237 phenotypic plasticity in general.

238         Why do adults and not juveniles affect mouth form? Given that St animals can develop  
239 faster (Serobyán et al., 2013), there may be a ‘race’ to sexual maturation in emergent  
240 populations at low densities. But as the nematode population increases, there will likely be a  
241 commensurate decrease in bacterial populations. When faced with competition from other  
242 nematodes, *P. pacificus* has a particular advantage in developing the Eu morph; their expanded  
243 dietary range includes their competition. Indeed, when nematode prey is the only available food  
244 source, the Eu morph provides longer life spans and more progeny than the St morph  
245 (Serobyán et al., 2014). When resources become depleted as population size increases, *C.*  
246 *elegans* and other monomorphic nematodes may enter dauer and disperse (Frézal and Félix,  
247 2015). But in St-biased dimorphic strains of *P. pacificus*, juveniles may switch to the Eu morph  
248 in response to adults as a first-level indication of rapidly increasing population size (Figure 6).  
249 Then, after prolonged starvation and crowding, worms will presumably enter dauer. By analogy  
250 to economic models of population growth (Malthus et al., 1992; Trewavas, 2002) mouth-form  
251 plasticity is a ‘technological innovation’ to temporarily escape a Malthusian resource trap. To

252 what extent this occurs in nature, or with *P. pacificus* strains that are highly Eu, remains to be  
253 determined.

254 The evolution of dimorphic mouth forms is one among myriad nematode ecological  
255 strategies. For example, entomopathogenic nematodes release their symbiont bacteria in insect  
256 hosts to establish their preferred food source, and some release antibiotics to kill off competing  
257 bacteria and fungi from other entomopathogenic species (Griffin, 2012). Some free-living  
258 species, like those of the genus *Oscheius*, refrain from combat and stealthily feed and  
259 reproduce amidst warring entomopathogenic species. Interspecific killing also occurs in  
260 gonochoristic species, in which both mated and virgin males are killed, implying fighting not just  
261 for mates but for resources as well (O'Callaghan et al., 2014; Zenner et al., 2014). Reproductive  
262 strategies also exist, and hermaphroditic species have an advantage over gonochoristic species  
263 when colonizing a new niche, such as an insect carcass (Campos-Herrera, 2015). Meanwhile  
264 insect hosts and colonizing nematodes have their own distinct pheromone-based attraction and  
265 toxicity (Cinkornpumin et al.; Renahan and Hong, 2017). Finally, the renaissance of *C. elegans*  
266 sampling from around the world (Cook et al., 2017; Evans et al., 2016; Félix et al., 2013;  
267 Petersen et al., 2014; Pouillet and Braendle, 2015) is rapidly building a resource of wild isolates  
268 that will almost certainly have different and fascinating ecologies. We hope our method for  
269 labeling and then combining different nematode populations on the same plate will aid in studies  
270 to identify these strategies. Perhaps the time is also ripe to complement these studies with more  
271 sophisticated ecological modelling that can lead to testable hypotheses.

272 Although beyond the scope of this manuscript, the cross-generational communication we  
273 observed could in principle reflect an intended signal from adults to juveniles, i.e. kin selection  
274 (Bourke, 2014). However, we favor a more simplistic view that juveniles have evolved to  
275 recognize adult-produced metabolites. Regardless of these interpretations, our results argue

276 that age classes are a critical factor in density-dependent plasticity, as has been theorized in  
277 density-dependent selection (Charlesworth, 1994).

278

### 279 **Limitations of the Study**

280 Given the ubiquity of certain traits in reproductive adults and their contribution to population  
281 growth, we suspect similar results will be found in other systems. However, it may depend on  
282 the phenotype and system being studied. For example, the population dynamics of nematodes  
283 (fast hermaphroditic reproduction) may be sufficiently different from other species such that our  
284 findings are not extendable in every case. In addition, our method of staining different  
285 populations, while fast and easy, is particular to nematodes.

286

### 287 **Methods**

288

289 \*See Transparent Methods in Supplemental Information

290

### 291 **Acknowledgements**

292 We would like to thank all members of the Sommer lab, Dr. Talia Karasov, Dr. Hernan Burbano  
293 and Moises Exposito-Alonso for guidance with statistical analysis, and Dr. Adrian Striet (Max  
294 Planck Institute), and Dr. Cameron Weadick (University of Sussex) for thoughtful critique and  
295 discussion.

296

### 297 **Author Contributions**

298 MSW and RJS conceived of the project. MC conducted pheromone profiling. MSW and TR  
299 designed and conducted dye-labeling experiments. TR and MC performed supernatant  
300 experiments. MD and MSW considered ecological implications. MSW and TR wrote the  
301 manuscript with input and edits from all authors.

302

303

304 **References**

- 305 Baskaran, P., Rödelberger, C., Prabh, N., Seroby, V., Markov, G.V., Hirsekorn, A., and  
306 Dieterich, C. (2015). Ancient gene duplications have shaped developmental stage-specific  
307 expression in *Pristionchus pacificus*. *BMC Evol. Biol.* 15, 185.
- 308 Ben Dantzer, Newman, A.E.M., Boonstra, R., Palme, R., Boutin, S., Humphries, M.M., and  
309 McAdam, A.G. (2013). Density Triggers Maternal Hormones That Increase Adaptive Offspring  
310 Growth in a Wild Mammal. *Science* 340, 1235765–1217.
- 311 Bento, G., Ogawa, A., and Sommer, R.J. (2010a). Co-option of the hormone-signalling module  
312 dafachronic acid–DAF-12 in nematode evolution. *Nature* 466, 494–497.
- 313 Bento, G., Ogawa, A., and Sommer, R.J. (2010b). Co-option of the hormone-signalling module  
314 dafachronic acid–DAF-12 in nematode evolution. *Nature* 466, 494–497.
- 315 Bose, N., Meyer, J.M., Yim, J.J., Mayer, M.G., Markov, G.V., Ogawa, A., Schroeder, F.C., and  
316 Sommer, R.J. (2014). Natural Variation in Dauer Pheromone Production and Sensing Supports  
317 Intraspecific Competition in Nematodes. *Current Biology* 24, 1536–1541.
- 318 Bose, N., Ogawa, A., Reuss, von, S.H., Yim, J.J., Ragsdale, E.J., Sommer, R.J., and  
319 Schroeder, F.C. (2012). Complex Small-Molecule Architectures Regulate Phenotypic Plasticity  
320 in a Nematode. *Angewandte Chemie International Edition* 51, 12438–12443.
- 321 Bourke, A.F.G. (2014). Hamilton's rule and the causes of social evolution. *Philosophical  
322 Transactions of the Royal Society of London B: Biological Sciences* 369, 20130362–20130362.
- 323 Butcher, R.A. (2017). Small-molecule pheromones and hormones controlling nematode  
324 development. *Nature Chemical Biology* 13, 577–586.
- 325 Butcher, R.A., Fujita, M., Schroeder, F.C., and Clardy, J. (2007). Small-molecule pheromones  
326 that control dauer development in *Caenorhabditis elegans*. *Nature Chemical Biology* 3, 420–  
327 422.
- 328 Butcher, R.A., Ragains, J.R., Kim, E., and Clardy, J. (2008). A potent dauer pheromone  
329 component in *Caenorhabditis elegans* that acts synergistically with other components. *Proc Natl  
330 Acad Sci USA* 105, 14288–14292.
- 331 Campos-Herrera, R. (2015). *Nematode Pathogenesis of Insects and Other Pests* (Cham:  
332 Springer).
- 333 Charlesworth, B. (1994). Evolution in age-structured populations.
- 334 Charlesworth, B. (1972). Selection in populations with overlapping generations. III. Conditions  
335 for genetic equilibrium. *Theoretical Population Biology*.
- 336 Chasnov, J.R., So, W.K., Chan, C.M., and Chow, K.L. (2007). The species, sex, and stage  
337 specificity of a *Caenorhabditis* sex pheromone. *Proc Natl Acad Sci USA* 104, 6730–6735.

- 338 Chen, B., Li, S., Ren, Q., Tong, X., Zhang, X., and Le Kang (2015). Paternal epigenetic effects  
339 of population density on locust phase-related characteristics associated with heat-shock protein  
340 expression. *Molecular Ecology* 24, 851–862.
- 341 Choe, A., Reuss, von, S.H., Kogan, D., Gasser, R.B., Platzer, E.G., Schroeder, F.C., and  
342 Sternberg, P.W. (2012). Ascaroside Signaling Is Widely Conserved among Nematodes. *Current*  
343 *Biology* 22, 772–780.
- 344 Cinkornpumin, J.K., Wisidagama, D.R., Rapoport, V., elife, J.G., 2014 A host beetle pheromone  
345 regulates development and behavior in the nematode *Pristionchus pacificus*.  
346 *Cdn.Elifesciences.org*
- 347 .
- 348 Cook, D.E., Zdraljevic, S., Roberts, J.P., and Andersen, E.C. (2017). CeNDR, the  
349 *Caenorhabditis elegans* natural diversity resource. *Nucleic Acids Res.* 45, D650–D657.
- 350 Diaz, S.A., Brunet, V., Lloyd-Jones, G.C., Spinner, W., Wharam, B., and Viney, M. (2014).  
351 Diverse and potentially manipulative signalling with ascarosides in the model nematode *C.*  
352 *elegans*. *BMC Evol. Biol.* 14, 46.
- 353 Dong, C., Reilly, D.K., Bergame, C., Dolke, F., Srinivasan, J., and Reuss, von, S.H. (2018).  
354 Comparative Ascaroside Profiling of *Caenorhabditis* Exometabolomes Reveals Species-Specific  
355 ( $\omega$ ) and ( $\omega - 2$ )-Hydroxylation Downstream of Peroxisomal  $\beta$ -Oxidation. *J. Org. Chem.* 83,  
356 7109–7120.
- 357 Dudley, S.A., and Schmitt, J. (2015). Testing the Adaptive Plasticity Hypothesis: Density-  
358 Dependent Selection on Manipulated Stem Length in *Impatiens capensis*. *The American*  
359 *Naturalist* 147, 445–465.
- 360 Evans, K.S., Zhao, Y., Brady, S.C., Long, L., McGrath, P.T., and Andersen, E.C. (2016).  
361 Correlations of Genotype with Climate Parameters Suggest *Caenorhabditis elegans* Niche  
362 Adaptations. *G3: Genes, Genomes, Genetics* 7, g3.116.035162–g3.116.035298.
- 363 Falcke, J.M., Bose, N., Artyukhin, A.B., Rödelberger, C., Markov, G.V., Yim, J.J., Grimm, D.,  
364 Claassen, M.H., Panda, O., Baccile, J.A., et al. (2018). Linking Genomic and Metabolomic  
365 Natural Variation Uncovers Nematode Pheromone Biosynthesis. *Cell Chem Biol* 25, 787–  
366 796.e12.
- 367 Félix, M.-A., Jovelin, R., Ferrari, C., Han, S., Cho, Y.R., Andersen, E.C., Cutter, A.D., and  
368 Braendle, C. (2013). Species richness, distribution and genetic diversity of *Caenorhabditis*  
369 nematodes in a remote tropical rainforest. *BMC Evol. Biol.* 13, 10.
- 370 Fielenbach, N., and Antebi, A. (2008). *C. elegans* dauer formation and the molecular basis of  
371 plasticity. *Genes & Development* 22, 2149–2165.
- 372 Frézal, L., and Félix, M.-A. (2015). The Natural History of Model Organisms: *C. elegans* outside  
373 the Petri dish. *Elife* 4, e05849.
- 374 Golden, J.W., and Riddle, D.L. (1982). A pheromone influences larval development in the  
375 nematode *Caenorhabditis elegans*. *Science* 218, 578–580.

- 376 Golden, J.W., and Riddle, D.L. (1985). A gene affecting production of the *Caenorhabditis*  
377 *elegans* dauer-inducing pheromone. *Mol. Gen. Genet.* 198, 534–536.
- 378 Greene, J.S., Brown, M., Dobosiewicz, M., Ishida, I.G., Macosko, E.Z., Zhang, X., Butcher, R.A.,  
379 Cline, D.J., McGrath, P.T., and Bargmann, C.I. (2016). Balancing selection shapes density-  
380 dependent foraging behaviour. *Nature* 539, 254–258.
- 381 Griffin, C.T. (2012). Perspectives on the behavior of entomopathogenic nematodes from  
382 dispersal to reproduction: traits contributing to nematode fitness and biocontrol efficacy. *J.*  
383 *Nematol.* 44, 177–184.
- 384 Hamouda, A.B., and, S.T.O.E., 2011 Density-dependent phenotypic plasticity in body coloration  
385 and morphometry and its transgenerational changes in the migratory locust, *Locusta migratoria*.  
386 *Journal of Entomology and Nematology*.
- 387 Hastings, A. (2013). *Population biology: concepts and models*.
- 388 Herrmann, M., Mayer, W.E., and Sommer, R.J. (2006). Nematodes of the genus *Pristionchus*  
389 are closely associated with scarab beetles and the Colorado potato beetle in Western Europe.  
390 *Zoology* 109, 96–108.
- 391 Herrmann, M., Mayer, W.E., Hong, R.L., Kienle, S., Minasaki, R., and Sommer, R.J. (2007). The  
392 Nematode *Pristionchus pacificus* (Nematoda: Diplogastridae) Is Associated with the Oriental  
393 Beetle *Exomala orientalis* (Coleoptera: Scarabaeidae) in Japan ( *Zoological Society of Japan*).
- 394 Izrayelit, Y., Srinivasan, J., Campbell, S.L., Jo, Y., Reuss, von, S.H., Genoff, M.C., Sternberg,  
395 P.W., and Schroeder, F.C. (2012). Targeted metabolomics reveals a male pheromone and sex-  
396 specific ascaroside biosynthesis in *Caenorhabditis elegans*. *ACS Chem. Biol.* 7, 1321–1325.
- 397 Jeong, P.-Y., Jung, M., Yim, Y.-H., Kim, H., Park, M., Hong, E., Lee, W., Kim, Y.H., Kim, K., and  
398 Paik, Y.-K. (2005). Chemical structure and biological activity of the *Caenorhabditis*  
399 *elegans* dauer-inducing pheromone. *Nature* 433, 541–545.
- 400 Kaplan, F., Srinivasan, J., Mahanti, P., Ajredini, R., Durak, O., Nimalendran, R., Sternberg,  
401 P.W., Teal, P.E.A., Schroeder, F.C., Edison, A.S., et al. (2011). Ascaroside Expression in  
402 *Caenorhabditis elegans* Is Strongly Dependent on Diet and Developmental Stage. *PLoS ONE* 6,  
403 e17804.
- 404 Ludwig, A.H., Gimond, C., Judkins, J.C., Thornton, S., Pulido, D.C., Micikas, R.J., Döring, F.,  
405 Antebi, A., Braendle, C., and Schroeder, F.C. (2017). Larval crowding accelerates *C. elegans*  
406 development and reduces lifespan. *PLoS Genet* 13, e1006717.
- 407 MacArthur, R.H. (1962). SOME GENERALIZED THEOREMS OF NATURAL SELECTION. *Proc*  
408 *Natl Acad Sci USA* 48, 1893–1897.
- 409 Maeno, K., and Tanaka, S. (2008). Maternal effects on progeny size, number and body color in  
410 the desert locust, *Schistocerca gregaria*: Density- and reproductive cycle-dependent variation.  
411 *Journal of Insect Physiology* 54, 1072–1080.
- 412 Malthus, T.R., Winch, D., and James, P. (1992). Malthus: “An Essay on the Principle of  
413 Population” (Cambridge University Press).



- 414 Markov, G.V., Meyer, J.M., Panda, O., Artyukhin, A.B., Claaßen, M., Witte, H., Schroeder, F.C.,  
415 and Sommer, R.J. (2016). Functional Conservation and Divergence of daf-22 Paralogs in  
416 *Pristionchus pacificus* Dauer Development. *Mol Biol Evol* 33, 2506–2514.
- 417 Meyer, J.M., Baskaran, P., Quast, C., Susoy, V., Rödelsperger, C., Glöckner, F.O., and  
418 Sommer, R.J. (2017). Succession and dynamics of *Pristionchus* nematodes and their  
419 microbiome during decomposition of *Oryctes borbonicus* on La Réunion Island. *Environmental*  
420 *Microbiology* 19, 1476–1489.
- 421 O’Callaghan, K.M., Zenner, A.N.R.L., Hartley, C.J., and Griffin, C.T. (2014). Interference  
422 competition in entomopathogenic nematodes: male *Steinernema* kill members of their own and  
423 other species. *International Journal for Parasitology* 44, 1009–1017.
- 424 Pener, M.P., and Simpson, S.J. (2009). *Locust Phase Polyphenism: An Update* (Elsevier).
- 425 Petersen, C., Dirksen, P., Prah, S., Strathmann, E.A., and Schulenburg, H. (2014). The  
426 prevalence of *Caenorhabditis elegans* across 1.5 years in selected North German locations: the  
427 importance of substrate type, abiotic parameters, and *Caenorhabditis* competitors. *BMC Ecol.*  
428 14, 4.
- 429 Poullet, N., and Braendle, C. (2015). Sampling and Isolation of *C. elegans* from the Natural  
430 Habitat. *Methods Mol. Biol.* 1327, 221–229.
- 431 Renahan, T., and Hong, R.L. (2017). A species-specific nematocide that results in terminal  
432 embryogenesis. *J. Exp. Biol.* 220, jeb.159665–3247.
- 433 Reuss, von, S.H., Bose, N., Srinivasan, J., Yim, J.J., Judkins, J.C., Sternberg, P.W., and  
434 Schroeder, F.C. (2012). Comparative metabolomics reveals biogenesis of ascarosides, a  
435 modular library of small-molecule signals in *C. elegans*. *J. Am. Chem. Soc.* 134, 1817–1824.
- 436 Sanghvi, G.V., Baskaran, P., Röseler, W., Sieriebriennikov, B., Rödelsperger, C., and Sommer,  
437 R.J. (2016). Life History Responses and Gene Expression Profiles of the Nematode  
438 *Pristionchus pacificus* Cultured on *Cryptococcus* Yeasts. *PLoS ONE* 11, e0164881.
- 439 Seroby, V., Ragsdale, E.J., and Sommer, R.J. (2014). Adaptive value of a predatory mouth-  
440 form in a dimorphic nematode. *Proceedings of the Royal Society of London B: Biological*  
441 *Sciences* 281, 20141334–20141989.
- 442 Seroby, V., Ragsdale, E.J., Müller, M.R., and Sommer, R.J. (2013). Feeding plasticity in the  
443 nematode *Pristionchus pacificus* influenced by sex and social context and is linked to  
444 developmental speed. *Evolution & Development* 15, 161–170.
- 445 Simpson, S.J., Despland, E., Hägele, B.F., and Dodgson, T. (2001). Gregarious behavior in  
446 desert locusts is evoked by touching their back legs. *Proc Natl Acad Sci USA* 98, 3895–3897.
- 447 Simpson, S.J., and Miller, G.A. (2007). Maternal effects on phase characteristics in the desert  
448 locust, *Schistocerca gregaria*: A review of current understanding. *Journal of Insect Physiology*  
449 53, 869–876.
- 450 Sloggett, J.J., and Weisser, W.W. (2004). *Aphids in a New Millennium* (INRA)

- 451 ).
- 452 Sommer, R.J., and Mayer, M.G. (2015). Toward a synthesis of developmental biology with  
453 evolutionary theory and ecology. *Annu. Rev. Cell Dev. Biol.* 31, 453–471.
- 454 Sommer, R.J., and McGaughan, A. (2013). The nematode *Pristionchus pacificus* as a model  
455 system for integrative studies in evolutionary biology. *Molecular Ecology* 22, 2380–2393.
- 456 Sommer, R.J., Dardiry, M., Lenuzzi, M., Namdeo, S., Renahan, T., Sieriebriennikov, B., and  
457 Werner, M.S. (2017). The genetics of phenotypic plasticity in nematode feeding structures.  
458 *Open Biology* 7, 160332–118.
- 459 Srinivasan, J., Reuss, von, S.H., Bose, N., Zaslaver, A., Mahanti, P., Ho, M.C., O'Doherty, O.G.,  
460 Edison, A.S., Sternberg, P.W., and Schroeder, F.C. (2012). A Modular Library of Small Molecule  
461 Signals Regulates Social Behaviors in *Caenorhabditis elegans*. *PLOS Biol* 10, e1001237.
- 462 Thomas, M.C., and Lana, P.D.C. (2008). Evaluation of vital stains for free-living marine  
463 nematodes. *Brazilian Journal of Oceanography* 56, 249–251.
- 464 Travis, J., Leips, J., and Rodd, F.H. (2013). Evolution in Population Parameters: Density-  
465 Dependent Selection or Density-Dependent Fitness? *The American Naturalist* 181, S9–S20.
- 466 Trewavas, A. (2002). Malthus foiled again and again. *Nature* 418, 668–670.
- 467 Werner, M.S., Sieriebriennikov, B., Loschko, T., Namdeo, S., Lenuzzi, M., Dardiry, M.,  
468 Renahan, T., Sharma, D.R., and Sommer, R.J. (2017). Environmental influence on *Pristionchus*  
469 *pacificus* mouth form through different culture methods. *Sci Rep* 7, 7207.
- 470 Wilecki, M., Lightfoot, J.W., Susoy, V., and Sommer, R.J. (2015). Predatory feeding behaviour  
471 in *Pristionchus* nematodes is dependent on phenotypic plasticity and induced by serotonin. *J.*  
472 *Exp. Biol.* 218, 1306–1313.
- 473 Zenner, A.N.R.L., O'Callaghan, K.M., and Griffin, C.T. (2014). Lethal Fighting in Nematodes Is  
474 Dependent on Developmental Pathway: Male-Male Fighting in the Entomopathogenic  
475 Nematode *Steinernema longicaudum*. *PLoS ONE* 9, e89385.

476

477

478

479

480

481 **Figure Legends**

482

483 **Figure 1. Life cycle and developmental plasticity of the model nematode *Pristionchus***  
484 ***pacificus*.**

485 (A) The life cycle of *P. pacificus* consists of four juvenile stages (J1-4) until sexual maturation  
486 (adults). Like many nematodes *P. pacificus* can enter a long-living 'dormant' dauer state that is  
487 resistant to harsh environmental conditions. The decision to continue through the direct life  
488 cycle or enter dauer is regulated by small molecule excreted ascarosides (chemical structure  
489 adapted from (Butcher, 2017)). (B) *P. pacificus* can also adopt one of two possible feeding  
490 structures; either a microbivorous narrow-mouth (stenostomatous, St), or (C) an omnivorous  
491 wide-mouth (eurystomatous, Eu) with an extra tooth that can be utilized to kill and eat other  
492 nematodes or fungi. White lines indicate the presence of an extra tooth (right side) in the Eu  
493 morph or its absence in the St morph, and the dorsal tooth (left side), which is flint-like in St and  
494 hook-like in Eu. White scale bar indicates 5  $\mu$ M. (D), *P. pacificus* is often found in a necromenic  
495 association with beetles (ex. shown here *Oryctes borbonicus*, photo taken by Tess Renahan) in  
496 the dauer state, and resumes the free living life cycle upon beetle death to feed on the ensuing  
497 microbial bloom.

498  
499 **Figure 2. Vital-dye method in nematodes allows mixing different populations together. (A-**  
500 **E) *P. pacificus* were stained with either 0.005% Neutral Red or 50  $\mu$ M CellTracker Green Bodipy**  
501 **(Thermo) and viewed using Cy3 and FITC filters. Images were merged with Differential**  
502 **interference contrast (DIC), scale bar = 100  $\mu$ M. An example of relative intensities of each**  
503 **fluorescence channel are displayed in the histograms (right) with the chemical structure of**  
504 **Neutral Red or CellTracker Green Bodipy. (F) Age-dependent functional pheromone assay:**  
505 **Experimental juveniles were stained with Neutral Red, and challenged with CellTracker Green**  
506 **Bodipy-stained juveniles or adults on standard condition NGM agar plates seeded with 300  $\mu$ l**

507 OP50 *E. coli*. Three days later, only red-positive and green-negative adults were phenotyped.

508

509 **Figure 3. Vital-dye method confirms adult-specific density effect on mouth form.**

510 (A) The wild isolate RSC017 grown in standard conditions (5 young adults passed to fresh  
511 plates, progeny phenotyped 4 days later) are highly stenostomatous (<10%,  $n=102$ ). (B,C)  
512 Mouth form ratios of Neutral Red-stained J2s, and (D,E) dauers, with increasing number of  
513 CellTracker Green-stained competitors, as described in Figure 2 ( $n=3-5$  independent biological  
514 replicates per experiment, with total  $n>100$  per experiment). Overall significance between strain  
515 and age was determined by a binomial linear regression (see Transparent Methods), and pair-  
516 wise comparisons were assessed by Fisher's exact test on summed Eu counts (Significance  
517 codes: '\*\*\*\*' < 0.001, '\*\*' < 0.01, '\*' < 0.05). Mouth forms were phenotyped at 40-100x on a Zeiss  
518 Axio Imager 2 light microscope. (F) Percent reaching adulthood and percent Eu of those that  
519 reached adulthood (G) after increasing numbers of J2s are added to standard 6 cm NGM agar  
520 plates with 300  $\mu$ l OP50 *E.coli* bacteria ( $n=2$  biological replicates, with total  $n>200$  for percent  
521 reaching adulthood, and total  $n>100$  for mouth form. Significance was determined by a binomial  
522 regression).

523

524 **Figure 4. Adult-specific secretions induce predatory morph in juveniles.**

525 Highly St strain RSC017 juveniles were exposed to J2 and adult supernatants of its own strain,  
526 and to the J2 and adult supernatants of highly Eu strain RS2333. Mouth form was phenotyped  
527 three days later. Worms exposed to J2 secretions remained highly St, while worms exposed to  
528 adult secretions had a small but significant increase in Eu morphs ( $p<0.05$ , Fisher's exact test).  
529 Supernatants from the double mutant *daf-22.1/2*, which has deficient ascaroside pheromone  
530 production, did not elicit juvenile or adult increase in Eu. Worms exposed to the S-media control  
531 also remained highly St.  $n=4$  independent biological replicates for RS2333 and *daf-22.1/2*

532 secretions, and n=2 independent biological replicates for RSC017 adult and juvenile secretions,  
533 with an average count of 55 animals per replicate. For display, total Eu and St counts are  
534 presented as percentages (Significance codes: '\*\*\*\*' < 0.001, '\*\*\*' < 0.01, '\*\*' < 0.05).

535

536 **Figure 5. Time-resolved Nematode-Derived Modular Metabolites (NDMMs) in *Pristionchus***  
537 ***pacificus*.**

538 (A) Time resolved secretion profile of nematode derived modular metabolites from the wild-type  
539 laboratory strain RS2333 and (B) wild isolate RSC017. Data is presented as the mean of 8  
540 (RS2333) and 9 (RSC017) biological replicates, and error bars represent standard error of the  
541 mean (SEM). (C-E) Chemical structures of adult specific NDMMs dasc#1, npar#1, and ascr#9,  
542 as described in the Small Molecule Identifier Database (<http://www.smid-db.org/>), produced in  
543 ChemDraw. (F-K) Time-resolved abundance of dasc#1, npar#1, and ascr#9 NDMMs in RS2333  
544 and RSC017. Each data point represents a biological replicate, and for comparison to (A-B)  
545 lines represent mean abundance. *P* values calculated by a 2-tailed students *t*-test (Significance  
546 codes: '\*\*\*\*' < 0.001, '\*\*\*' < 0.01, '\*\*' < 0.05).

547

548 **Figure 6. Conceptual model of the role of critical age classes in mouth-form**  
549 **phenotypic plasticity.** Conceptual life cycle models of monomorphic or dimorphic mouth  
550 form nematodes. In an isolated niche such as a decaying insect carcass, at some point  
551 microbial food supplies will run out, leading to a Malthusian catastrophe. Nematodes escape  
552 this trap by entering the dauer state, hitchhiking to a new insect carrier, and re-starting the  
553 cycle. Dimorphic nematodes may sense the impending catastrophe earlier by recognizing an  
554 abundance of adults in the population, and switching to the Eu morph to exploit new resources  
555 and kill competitors. By analogy to economic models, the mouth form switch is a technological

556 innovation to temporarily escape a Malthusian resource trap.

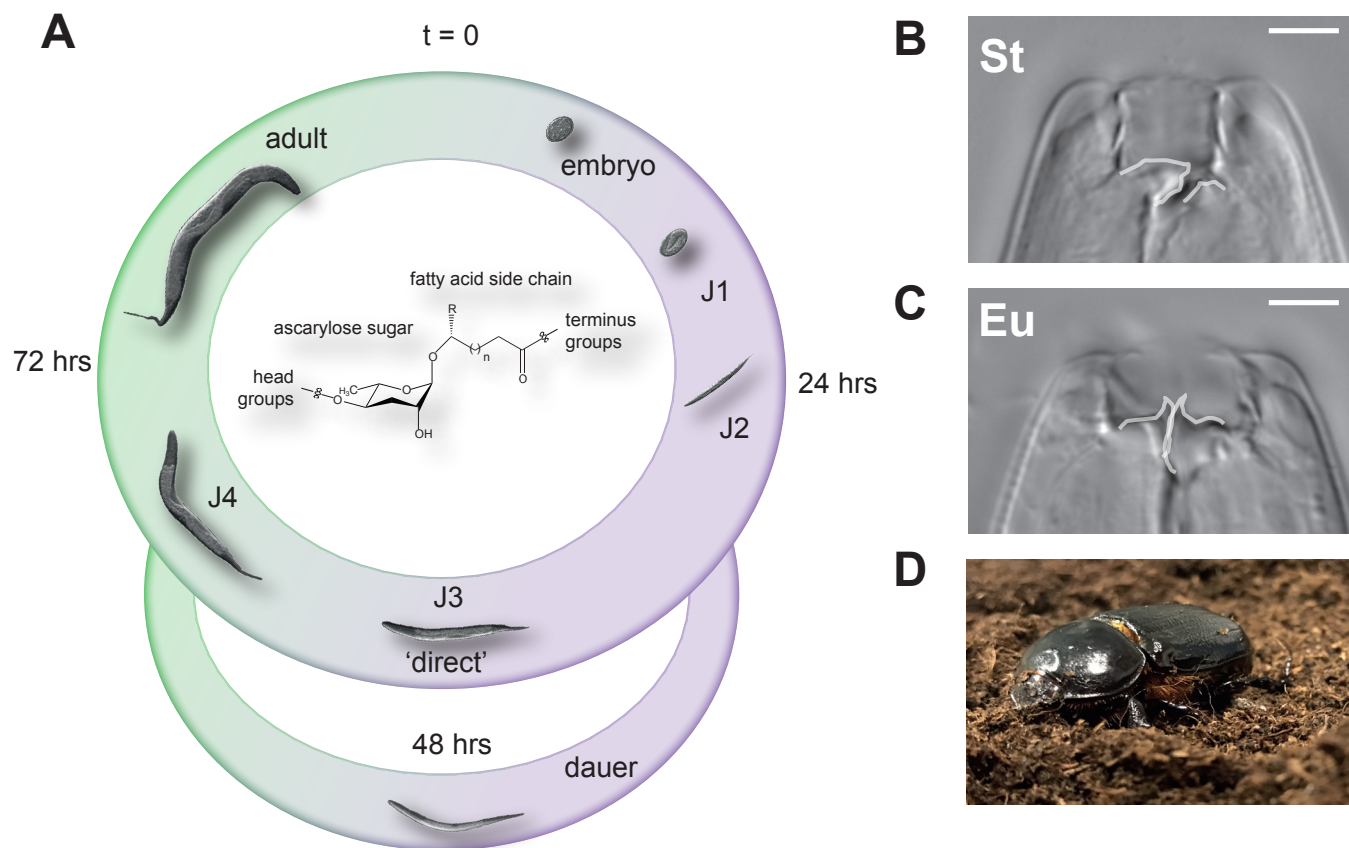

Figure 1. Life cycle and developmental plasticity of the model nematode *Pristionchus pacificus*.

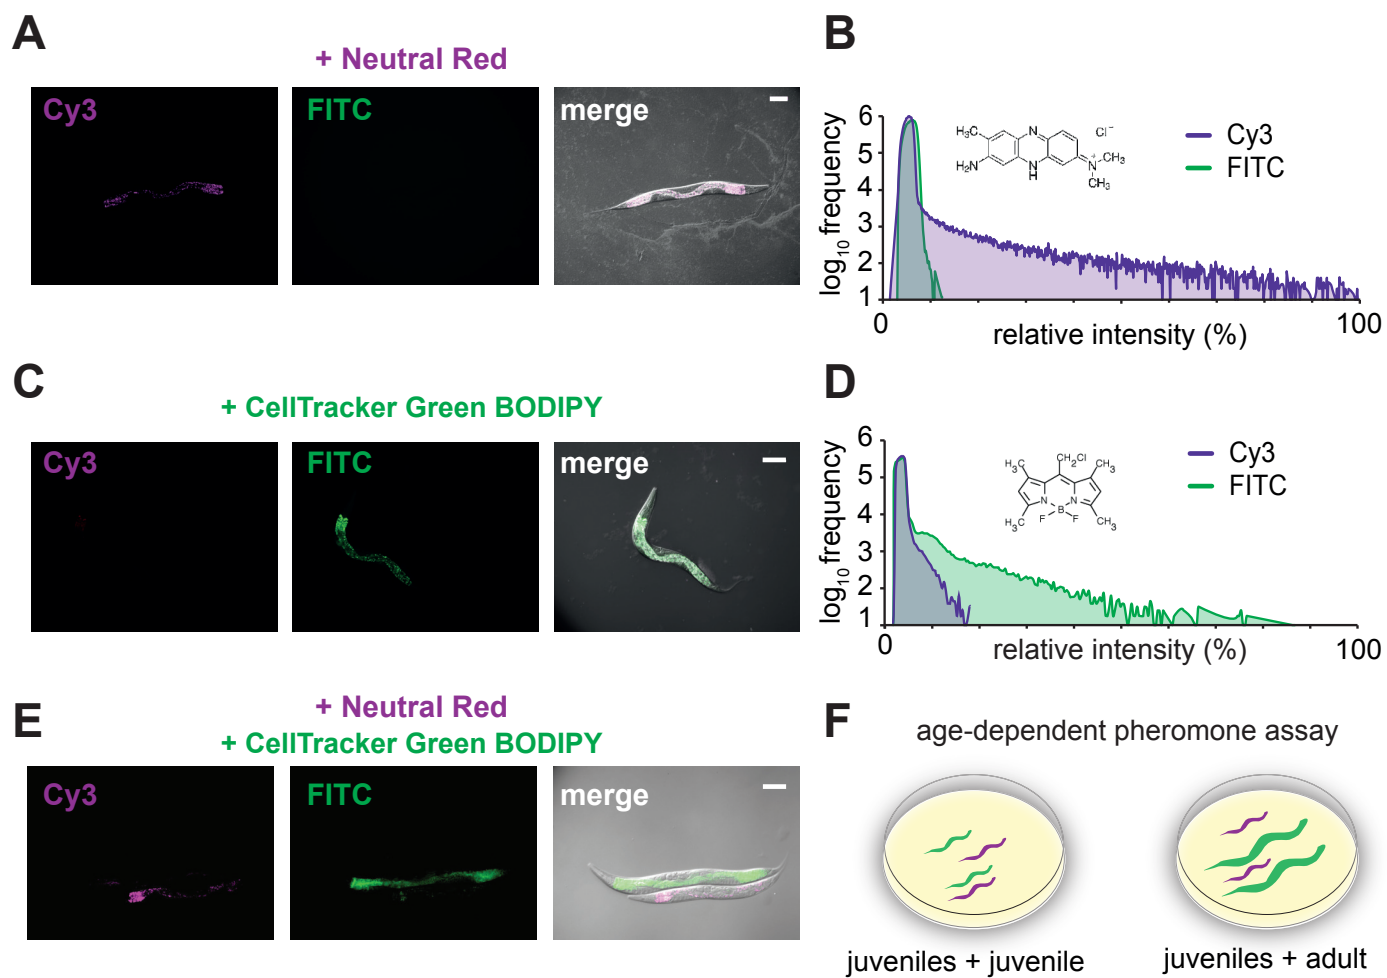

Figure 2. Vital-dye method in nematodes allows mixing different populations together.



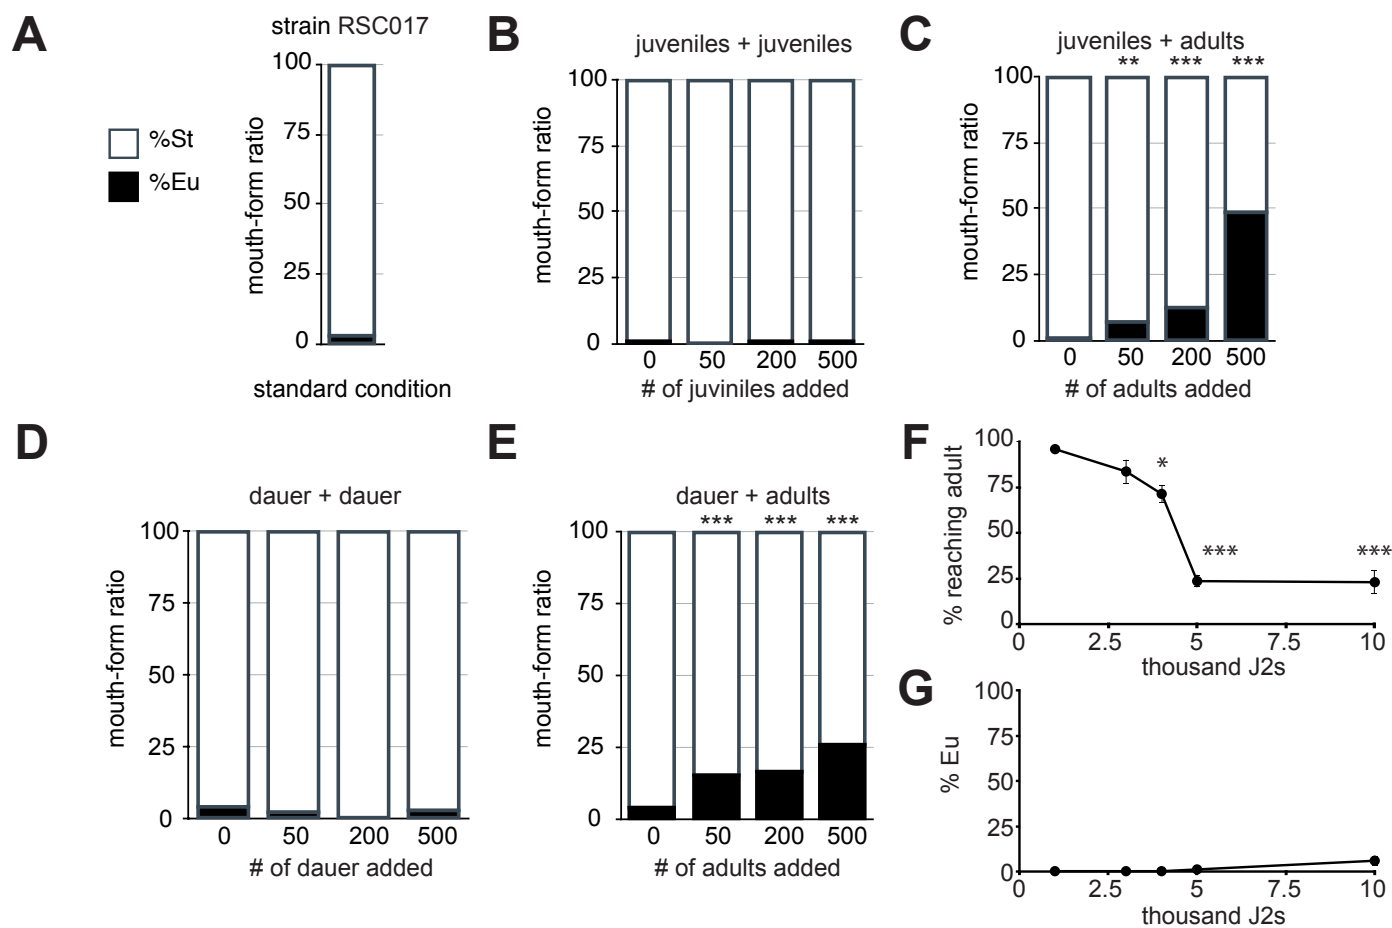

Figure 3. Vital-dye method confirms adult-specific density effect on mouth form.

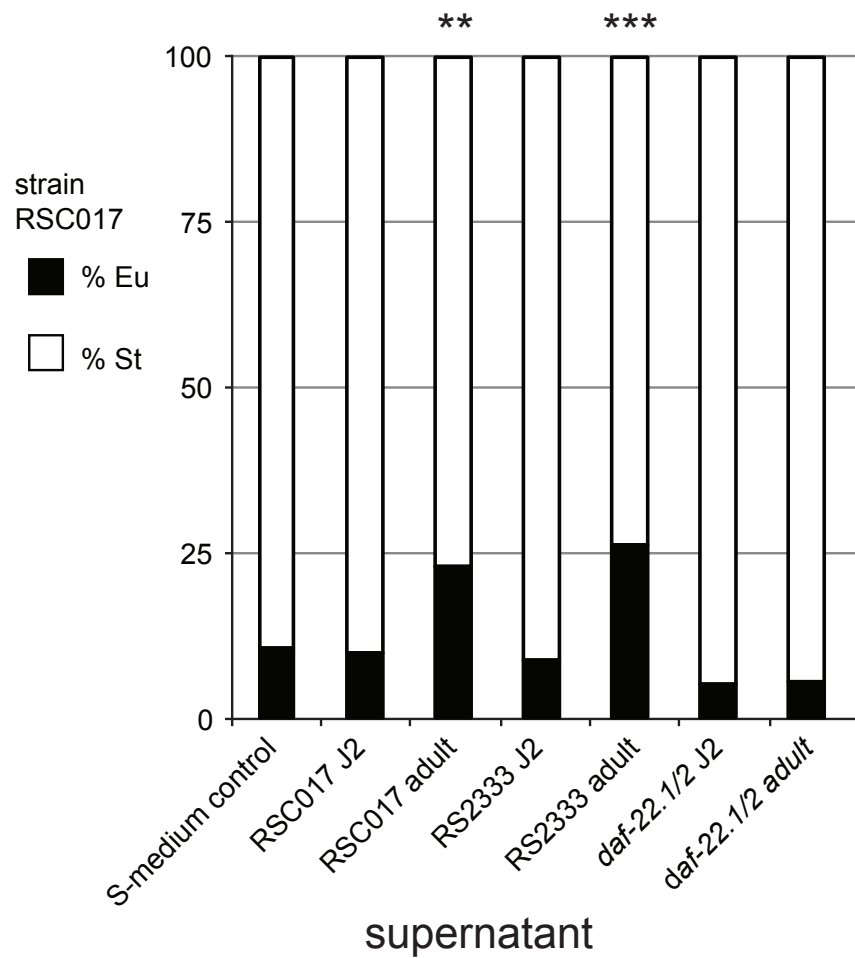

Figure 4. Adult-specific secretions induce predatory morph in juveniles.

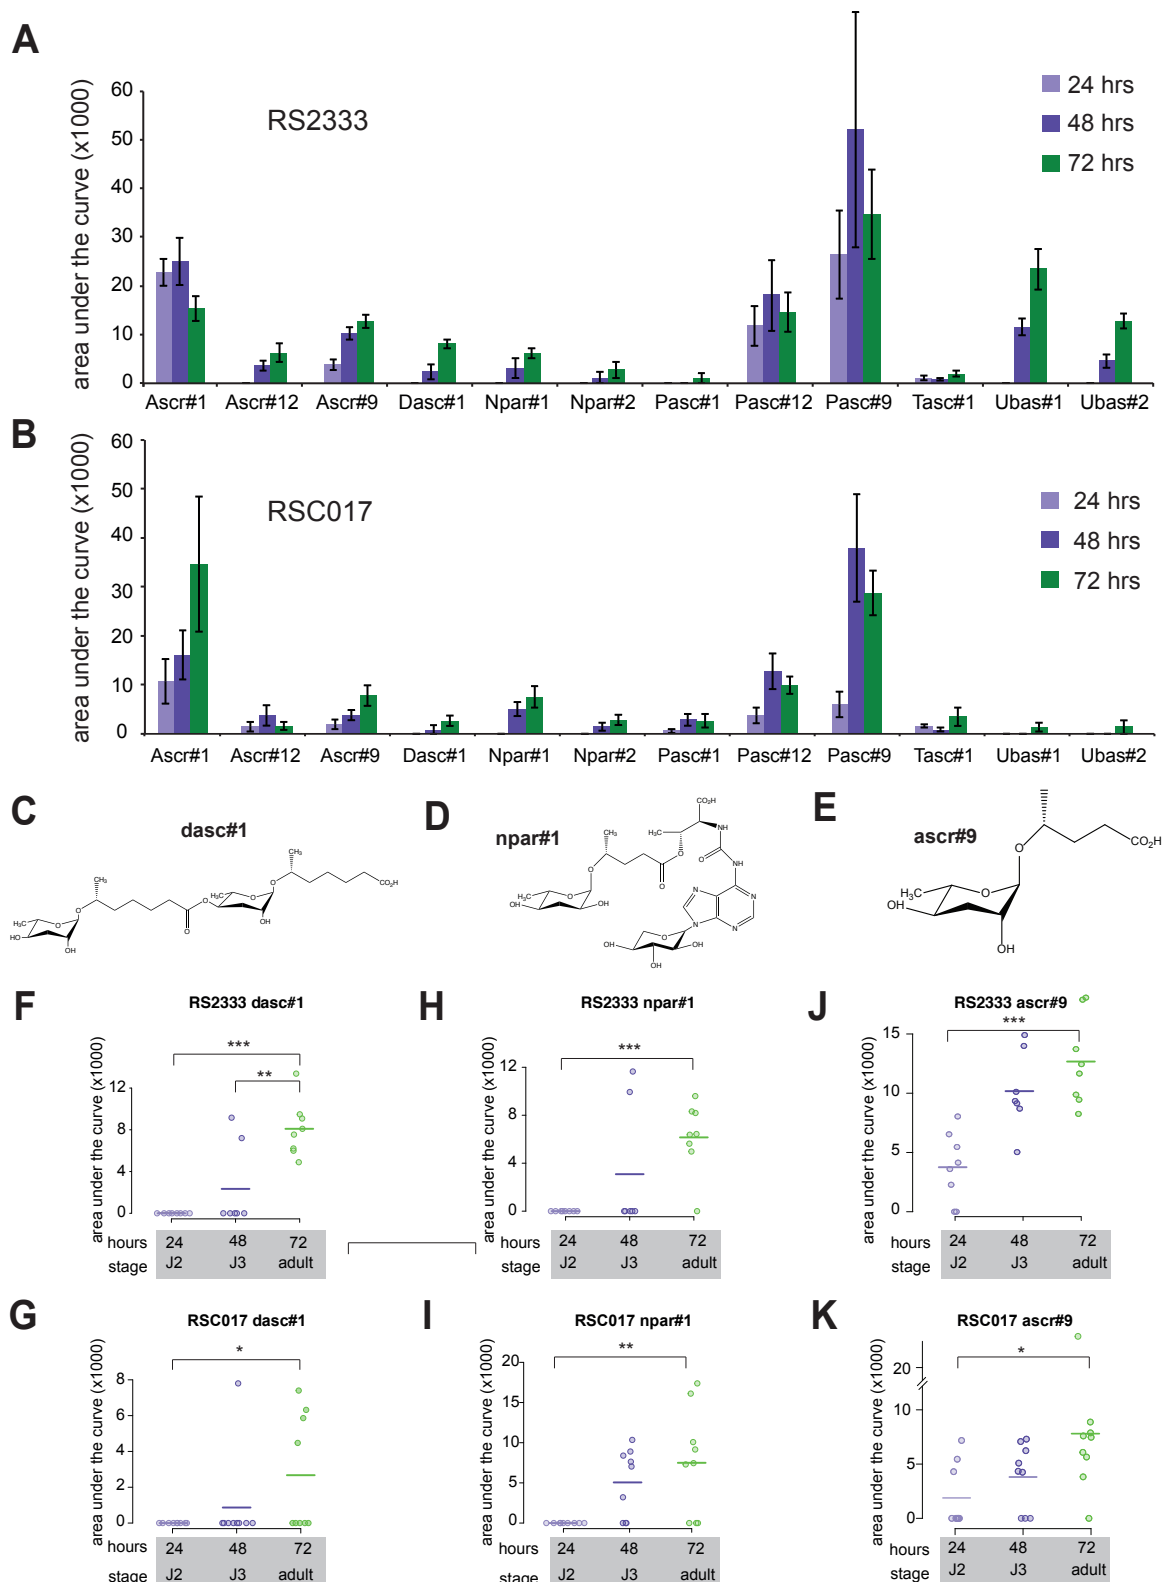

**Figure 5. Time-resolved Nematode-Derived Modular Metabolites (NDMMs) in *Pristionchus pacificus*.**

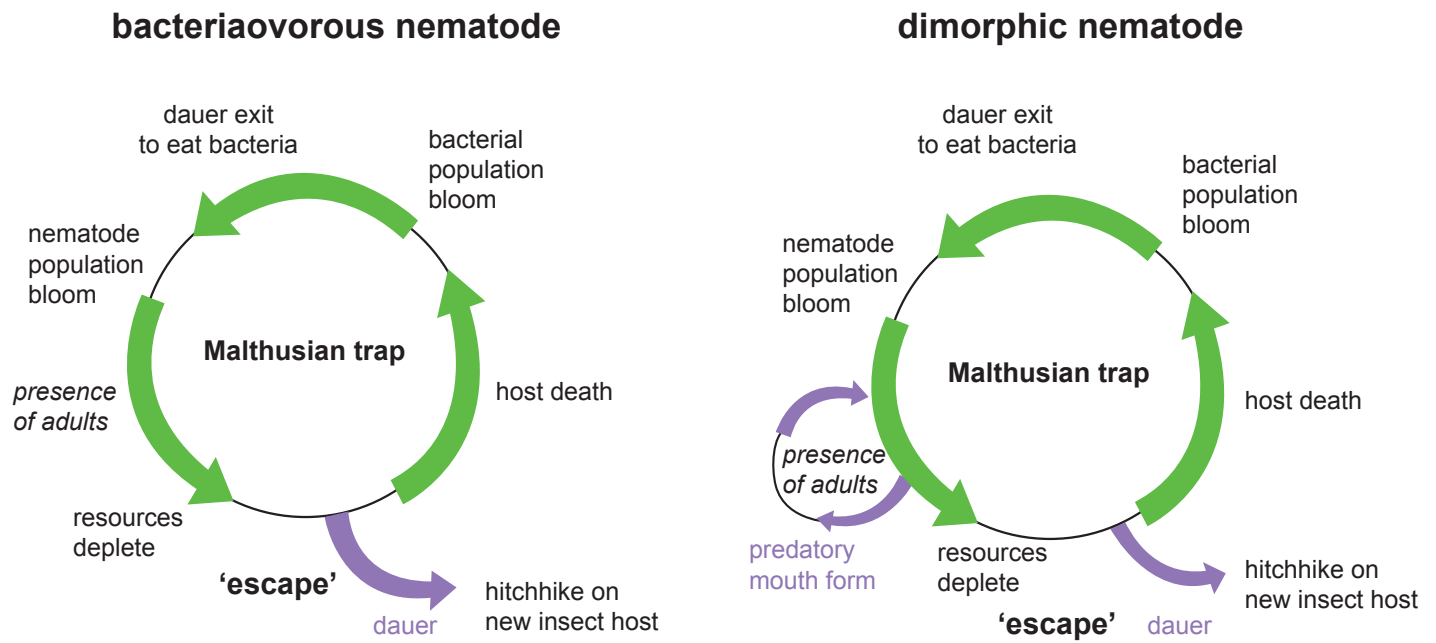

Figure 6. Conceptual model of the role of critical-age classes in mouth-form phenotypic plasticity.

## Supplemental Information

### Transparent Methods

#### Nematode strains and husbandry

*P. pacificus* Wild-type RS2333 (California) and RSC017 (La Réunion) strains were kept on 6 cm nematode growth media (NGM) plates seeded with OP50 and kept at 20°C. RSC017 is highly St and does not predate on other nematodes, and thus was used for biological assays instead of the highly Eu, predatory RS2333. To induce dauer, mixed-stage plates with little to no OP50 were washed with M9 and the resulting worm pellets were used in a modified 'White Trap' method. Worm pellets were placed on killed *Tenebrio molitor* grubs and dispersing dauers were collected in surrounding MilliQ water. Age of dauers ranged from one week to one month.

#### Dye staining

A stock solution of Neutral Red was prepared by dissolving 0.5 mg in 10 ml 5% acetic acid and stored at -20° C. Working solutions were prepared by 100x dilution in M9, aliquoted, stored at -20°C, and thawed directly before use. Working solutions were kept for approximately 1 month. Stock solutions of 10 mM Green Bodipy were made in DMSO and stored -20. J2s were prepared from 20-40 x 6 cm plates 6 days after passaging 5 worms to each plate on 300 µl OP50. Worms were washed from plates with M9 into a conical tube, and then filtered through 2x20 µM filters (Millipore) placed between rubber gaskets. The flow-through contains mostly J2 and some J3, which were pelleted by centrifugation, 8 seconds on a table-top eppendorf centrifuge 5424, reaching approximately 10,000 x g. The juvenile pellet was then either re-

Werner, et al. Adult influence on juvenile phenotypes by stage-specific pheromone production

---

suspended in 1 ml Neutral Red working solution, or in 1 ml M9 and split to two tubes, then re-centrifuged, and then re-suspended in either 1 ml working solution Neutral Red (0.005% in M9) or 1 ml 50  $\mu$ M Green BODIPY (Thermo) in M9. Tubes were then rotated for 3 hours in the dark, then washed by centrifugation as before, and re-suspended in 1 ml M9. This was repeated 3-4x until the dye was no longer visible in the worm pellet. Then, the concentration of worms was determined by aliquoting 2  $\mu$ l onto a glass coverslip in 5 technical replicates, and counted under a dissecting microscope. Finally the appropriate number of animals was added to 6 cm plates that had been previously seeded with 300  $\mu$ l OP50, and incubated at 20°C. After 3 days, 100% of worms exhibited Neutral Red staining ( $n=50$ , Supplementary figure 4). Dauers and J2s recovered after Neutral Red staining developed at the same developmental speed (3-4 days) and with the same mouth-form ratio as control worms recovered side-by-side (100% St for both, Supplementary figure 5,  $n=30$ ). Dauers and J2s stained with Cell tracker Green BODIPY (50  $\mu$ M) (Thermo) were similar, although less efficiently stained compared to Neutral Red. On day 4, 90% retained intestinal fluorescence (Supplementary figure 4), although brightness decreased with the number of days. Mouth-form ratios of dauers or J2s in +/- 50  $\mu$ M Cell tracker Green BODIPY also developed at equivalent rates and mouth-form ratios (Supplementary figure 5). Lower than 25  $\mu$ M did not yield strongly fluorescent worms after three hours. Cell Tracker Blue CMAC (Thermo) was also used at 50  $\mu$ M and imaged 3 days post-staining for *P. pacificus*, and one day post-staining for *C. elegans*. However, due to the higher fluorescent background in the blue light spectrum in both *P. pacificus* and *C. elegans*, we performed all experiments using only Neutral Red and Cell tracker Green BODIPY.

### Microscopy

All images were taken on a Zeiss Axio Imager 2 with an Axiocam 506 mono, and processed using Zen2 pro software. Image brightness and contrast were enhanced in ImageJ with a

minimum displayed value of 10 and maximum of 100 for all images in Fig 2, and Supplementary figures 4 and 5, and a minimum of 21 and maximum of 117 for Supplementary figure 3. The following exposure times were used for all images: Cy3 (peak emission = 561, exposure = 80 ms), FITC (peak emission = 519, exposure = 150 ms), Dapi (peak emission = 465, exposure = 80 ms), DIC (exposure = 80-140 ms).

### **Mixed culture experiments and statistical analysis**

We performed mixed culture experiment presented in figure 2 with 3 to 5 independent biological replicates, and a minimum total number of counts  $n > 100$  (median counts per replicate for J2=29 and the median counts per replicate for dauers=27). J2 or dauers were stained with Neutral Red as described in the 'Dye Staining' method section, then added to green-stained J2, dauer, or adult populations on 6 cm plates with 300  $\mu$ l OP50 and incubated at 20° C. To ensure consistent bacterial food supply, we added 1 ml more overnight OP50-LB to each plate on the following day, then air-dried under a chemical fume hood for 1 hour, then returned to 20° C. On days 3-4, we phenotyped 'red' adults that exhibited no 'green' staining. To assess whether the age of the 'green' surrounding population affects the mouth form of the dependent variable 'red' J2s we performed a binomial regression on Eu counts (i.e. "successes") weighted by the number of counts per replicate and the number added as a fixed effect, using a generalized linear model from the standard statistical package in R:

```
glm(formula=cbind(Eu,total)~'stage_added' * '#_added', data='J2/Da', family="binomial")
```

See Supplementary figure 6a for a table containing the resulting  $p$  values. The AIC for our models (78.97 for J2s and 89.59 for dauers) was substantially lower than the null hypothesis (220.16 for J2s and 147.29 for dauers), arguing a reasonable fit. For pair-wise comparisons of the effect of age for a given number of added animals, we performed a post-hoc Fisher's exact test on a contingency table containing the summed counts of Eu and St observations. For

display, we converted Eu counts into percent of total in figure 2, with the  $p$  values between the same number of animals added indicated over the adult-added population (Significance codes: 0 '\*\*\*\*' 0.001, '\*\*' 0.01, '\*' 0.05).

### **Measuring the effect of food depletion on mouth form**

To verify that starvation was not a factor in our mixed culture experiments, we added increasing number of J2s to standard 6 cm plates with 300  $\mu$ l OP50 to rapidly consume bacterial food, and measured both the amount of animals that reached adulthood, and the percent Eu in each population for two biological replicates. To assess the affects of added J2s to each dependent variable we performed a binomial regression with count data weighted by the total number of counts for each replicate:

```
glm(formula = cbind(reached_adult, total)~thousand_J2s, data=data_2, family="binomial")
```

$p$  values indicate a significant difference in percent reaching adult as a function of J2s added, but not in percent Eu (Table S1).

### **Supernatant collection and assays**

Strains RS2333, RSC017, and RS2333-*daf-22.1;22.2* were raised in 10 mL liquid culture as in the time-resolved NDMM collections (see below). For each time point, 9 mL of the supernatant was lyophilized overnight, extracted again overnight with 90% ethanol (diluted in Millipore water) while being stirred, and centrifuged (4000g, 10 min, 4°C). The solvent was evaporated and the solid re-dissolved with 1 mL Millipore water. This clear extract was then directly used for the assays. One mL of the supernatant was cleaned for HPLC-MS analysis (refer to pheromone profiling: HPLC-MS sample preparation) for quality control. For the assays, RSC017 was synchronized by bleaching and added to plates seeded with 300  $\mu$ l OP50. The supernatants were added to the RSC017 J2s in two 500  $\mu$ l increments (for a total of 1ml supernatant) and



dried for 30 minutes in a sterile hood after each addition. Plates were kept at 20°C and adult mouth forms were screened three days later.

### **HPLC-MS sample preparation for normal exo-metabolome and time resolved analysis**

To collect staged pheromone profiles, we seeded 35 x 6 cm plates with 5 worms each, and bleached 5-6 days later when gravid to collect eggs/J1s. These were then seeded in 6 x 10 mL flasks with OP50 as described in Werner et al., 2017 (Werner et al., 2017). Then at 24, 48, or 72 hr time intervals, supernatant was obtained by centrifugation (>4,000 x g, 4°C for 10 minutes). 1 mL supernatant was adsorbed onto a SPE-C8 cartridge (Thermo Scientific Hypersept C8 100 mg/1mL), conditioned with 1 mL MeOH followed by 2 mL Millipore water. The adsorbed material was then washed with 200 uL water and subsequently eluted with 200 uL MeOH. This extract was then measured directly via HPLC-qTof MS (Bruker ImpactII).

### **HPLC-MS measurement**

20 uL extract was injected into a Thermo ultimate 3000 HPLC equipped with a Sigma-Aldrich Ascentis Express C18 2.7um 10mm x 4.6mm column at 20 °C with a flow of 500 uL/min. All MS measurements have been performed in negative ion mode and molecules are detected as [M-H]<sup>-</sup> ions. The solvent gradient started with 5 % acetonitrile (ACN)/ 95 % water (both containing 0.1 % formic acid) for 2 min. After this equilibration step, the ACN proportion has been increased to 65 % over 8 min, then to 100 % ACN in 1.2 min followed by a hold step for 8.8 min. Afterwards, the system was flushed to 5 % ACN with 2 min equilibration for a total of 22 min. For calibration, a sodium formiat cluster building solution has been automatically injected in the first 2 minutes of each run. Data analysis was performed with TASQ version 1.0 from Bruker Daltonics. Extracted ion chromatograms for each well-known compound with a mass width of 0.1 m/z and time slices of 0.5 min around the expected retention time have been produced after

calibrating and baseline correction. Assignment errors have been corrected with the provided MRSQ value.

### **Statistical analysis of NDMMs**

NDMM levels were compared simultaneously between strains and developmental stages by a linear model in R: `lm('NDMM' ~ 'developmental stage' * 'strain', data='data.frame')`). *P* values between stages and strains were adjusted for multiple testing by a false discovery rate correction. The level of fit between linear vs. exponential growth was determined by the Akaike information criterion (AIC). The lowest AIC for iterations of different exponents ( $n=1,2,3\dots$ ) was used for comparison to the simple linear model. While significant in both cases, for consistency we present the original *p* values from the original linear model in Supplementary Figure 8.

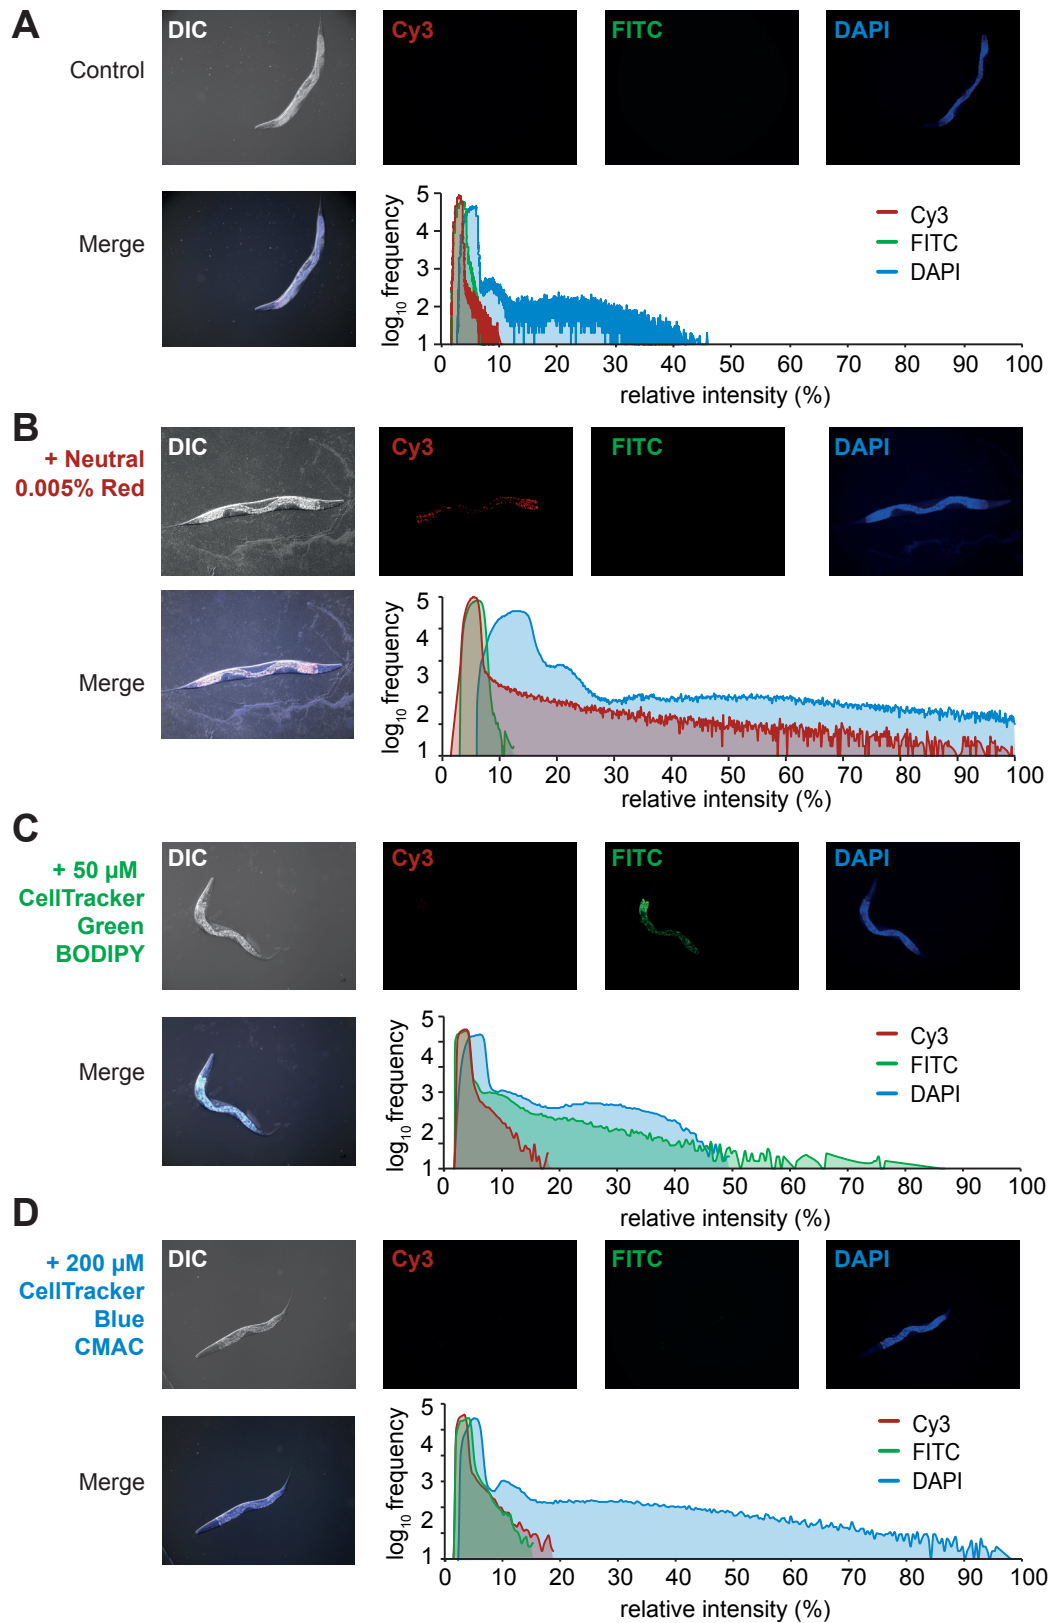

Figure S1, related to Figure 2. Vital dye staining of *Pristionchus pacificus*.

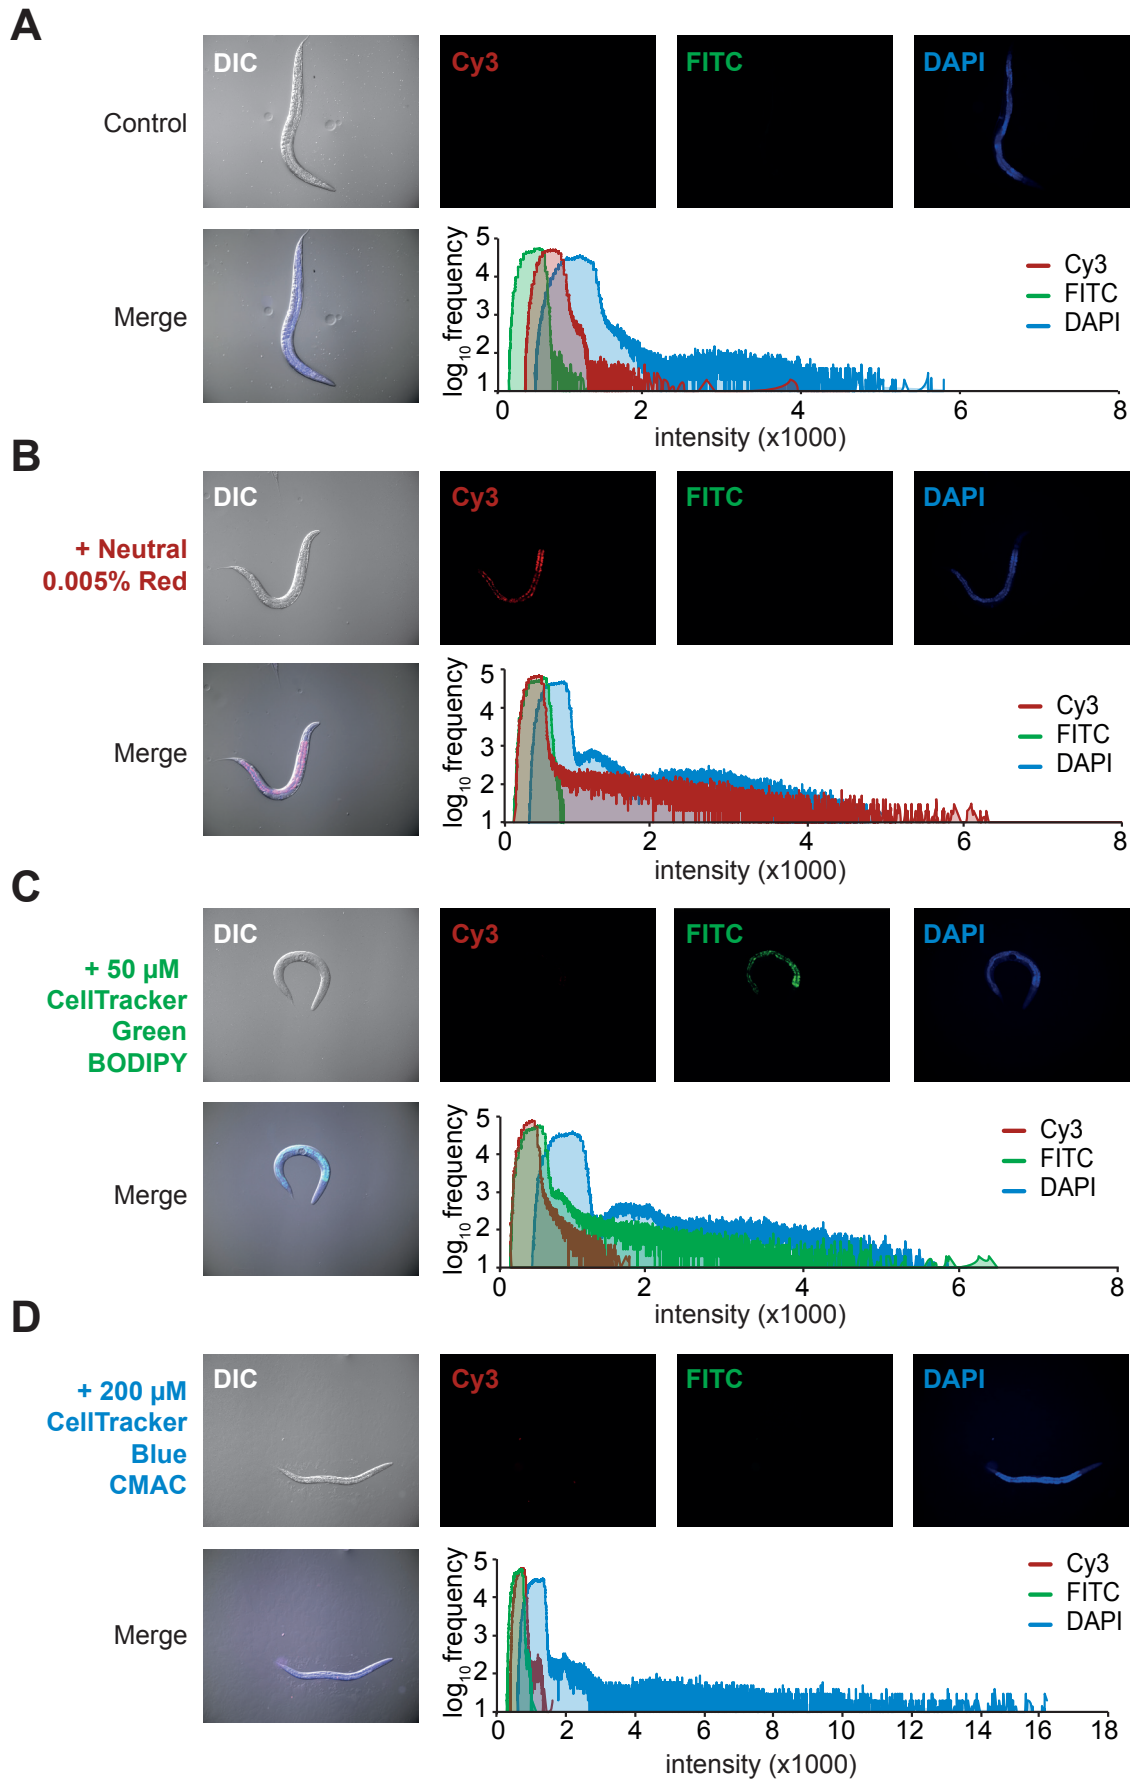

Figure S2, related to Figure 2. Vital dye staining of *Caenorhabditis elegans*.

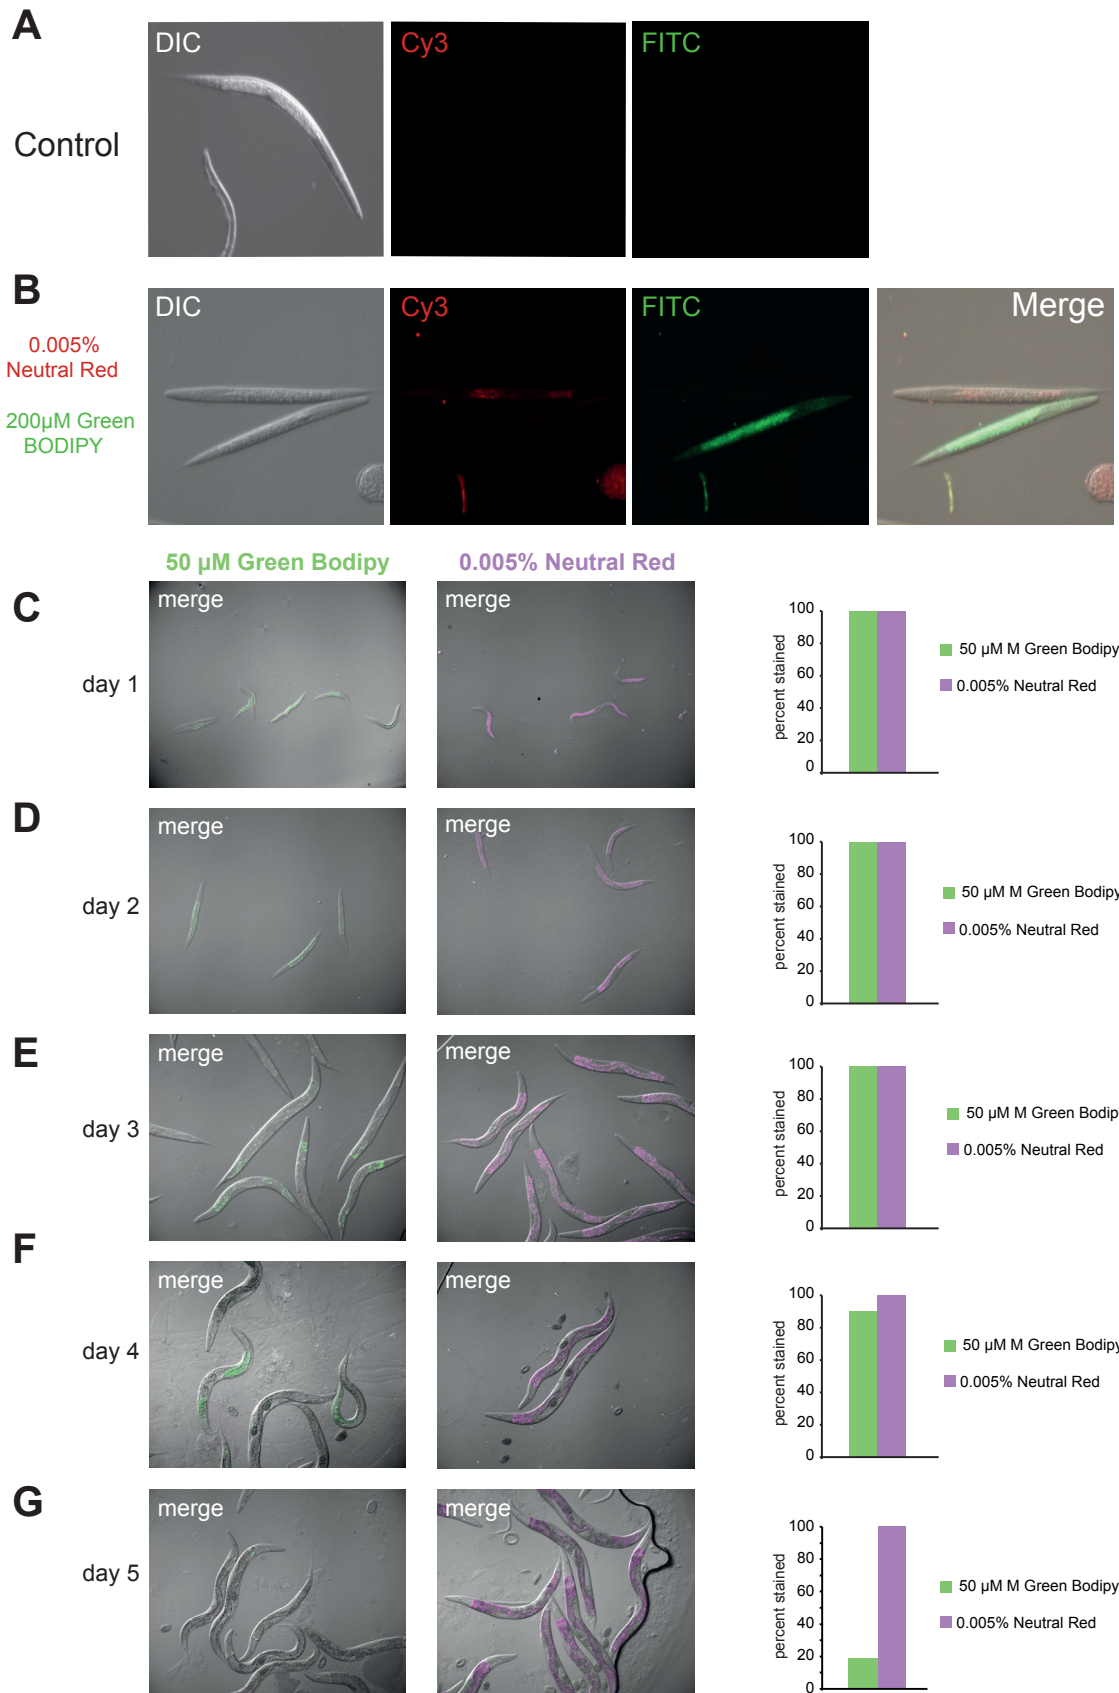

Figure S3, related to Figure 2. Vital dye staining of *Pristionchus pacificus* dauers, and duration of staining.

J2

**A**

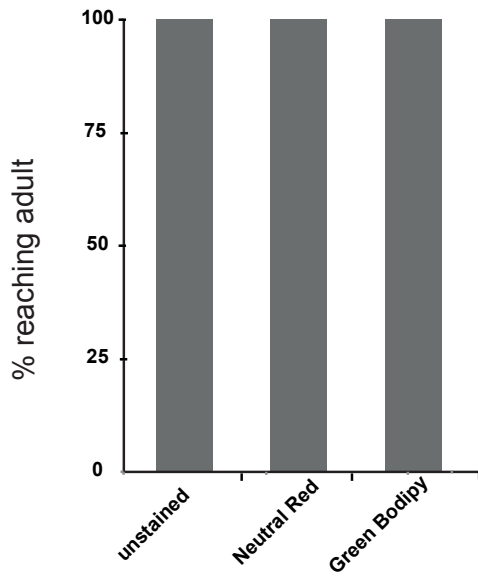

**B**

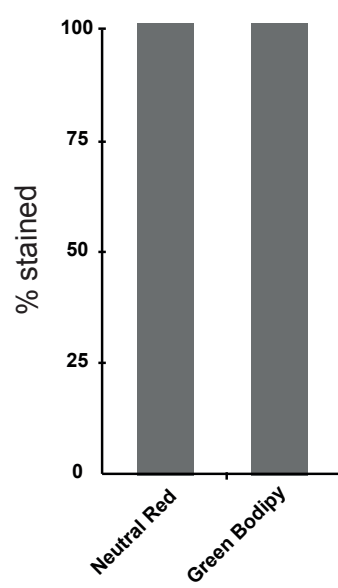

**C**

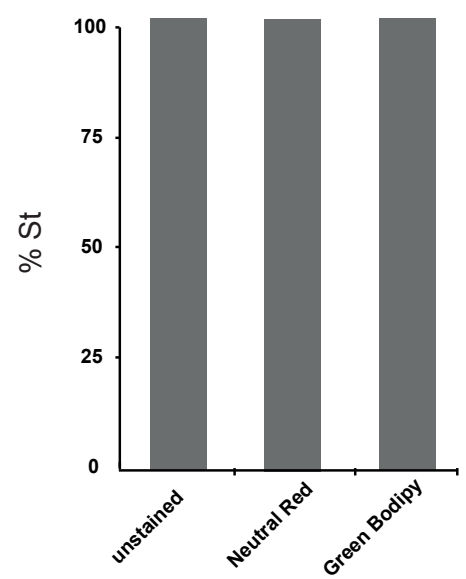

Dauer

**D**

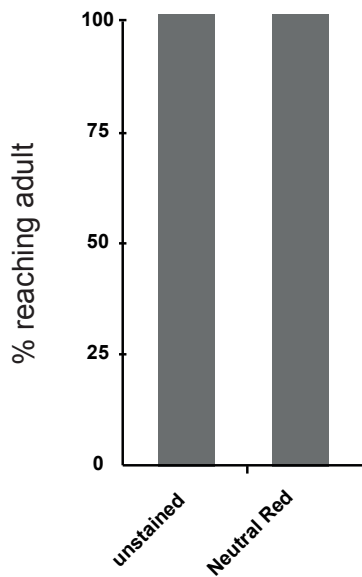

**E**

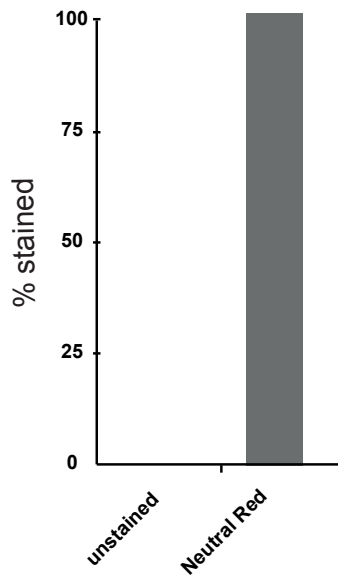

**F**

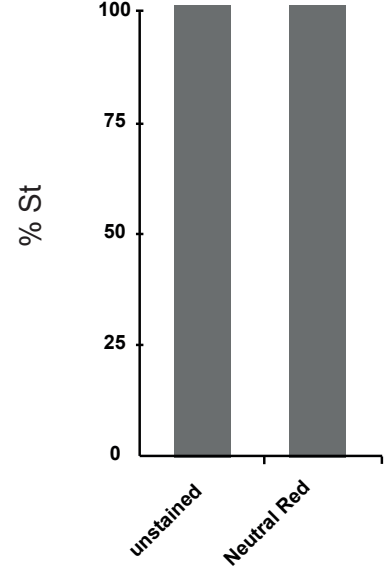

Figure S4, related to Figure 2. Vital dye staining does not affect *P. pacificus* mouth form or development.

### **affect of population age on mouth form of developing juveniles**

| <b>binomial regression</b> | <b><i>p</i> value<br/>J2s</b> | <b><i>p</i> value<br/>dauers</b> |
|----------------------------|-------------------------------|----------------------------------|
| <b>age added</b>           | 0.0259                        | 0.002955                         |
| <b>number added</b>        | 4.28e-13                      | 0.000404                         |

### **affect of number of peers on development and mouth form (proxy for potential starvation effects on mouth form)**

| <b>binomial regression</b> | <b><i>p</i> value for development<br/>(relative to 1,000)</b> | <b><i>p</i> value for Eu<br/>(relative to 1,000)</b> |
|----------------------------|---------------------------------------------------------------|------------------------------------------------------|
| <b>3,000 J2s added</b>     | 0.3408                                                        | 1.0                                                  |
| <b>4,000 J2s added</b>     | 0.0424                                                        | 1.0                                                  |
| <b>5,000 J2s added</b>     | 6.06E-14                                                      | 0.99                                                 |
| <b>10,000 J2s added</b>    | 4.09E-14                                                      | 0.99                                                 |

**Table S1, related to Figure 3. Table of binomial regression *p* values for vital-dye method and excess crowding.**

**A**

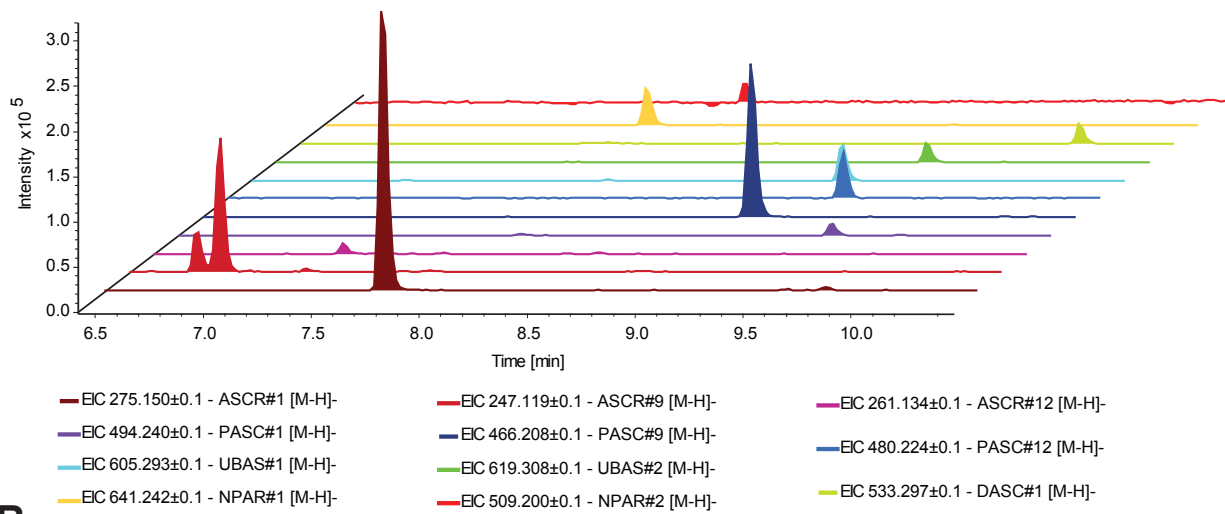

**B**

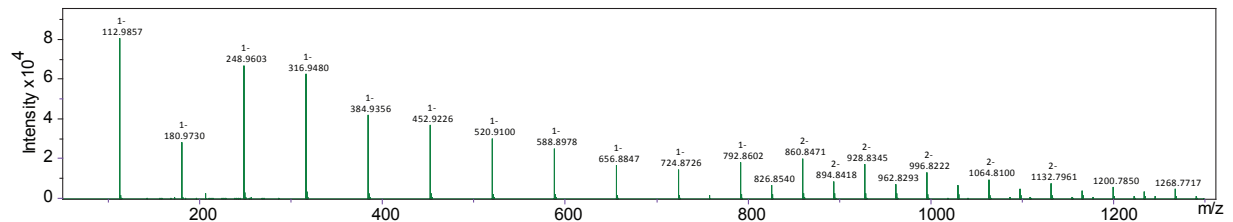

**C**

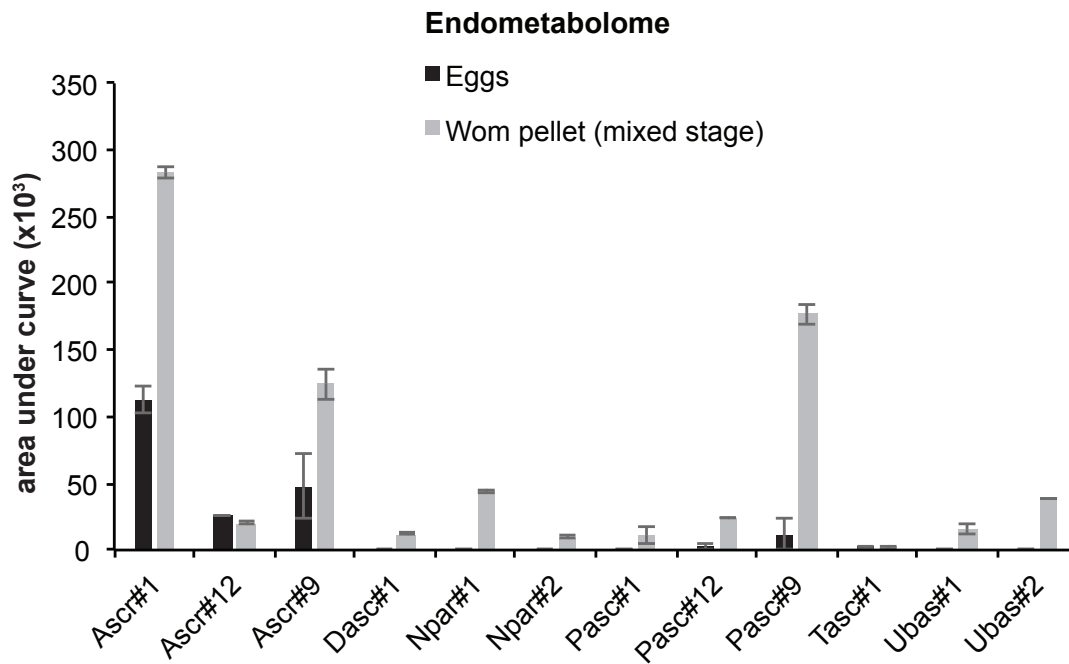

Figure S5, related to Figure 5. Pheromone profiling quality control



| <b>NDMM comparison</b> | <b>pvalue</b> | <b>fdr corrected</b> |
|------------------------|---------------|----------------------|
| ascr1_stage            | 0.4733        | 0.774490909          |
| ascr1_strain           | 0.0429        | 0.110314286          |
| ascr1_stage:strain     | 0.031         | 0.085846154          |
| ascr9_stage            | 3.79E-05      | 0.0002274            |
| ascr9_strain           | 0.651         | 0.778064516          |
| ascr9_stage:strain     | 0.272         | 0.50148              |
| ascr12_stage           | 0.0029        | 0.01404              |
| ascr12_strain          | 0.0897        | 0.201825             |
| ascr12_stage:strain    | 0.0302        | 0.085846154          |
| dasc1_stage            | 9.62E-08      | 8.66E-07             |
| dasc1_strain           | 0.11363       | 0.240628235          |
| dasc1_stage:strain     | 0.00351       | 0.01404              |
| npar1_stage            | 0.0033        | 0.01404              |
| npar1_strain           | 0.9426        | 0.984                |
| npar1_stage:strain     | 0.6355        | 0.778064516          |
| npar2_stage            | 0.0516        | 0.12384              |
| npar_2strain           | 0.984         | 0.984                |
| npar2_stage:strain     | 0.9716        | 0.984                |
| pasc1_stage            | 0.449         | 0.769714286          |
| pasc1_strain           | 0.753         | 0.847125             |
| pasc1_stage:strain     | 0.564         | 0.778064516          |
| pasc9_stage            | 0.616         | 0.778064516          |
| pasc9_strain           | 0.267         | 0.50148              |
| pasc9_stage:strain     | 0.523         | 0.778064516          |
| pasc12_stage           | 0.6122        | 0.778064516          |
| pasc12_strain          | 0.2786        | 0.50148              |
| pasc12_stage:strain    | 0.67          | 0.778064516          |
| tasc1_stage            | 0.522         | 0.778064516          |
| tasc1_strain           | 0.862         | 0.940363636          |
| tasc1_stage:strain     | 0.57          | 0.778064516          |
| ubas1_stage            | 3.13E-12      | 1.13E-10             |
| ubas1_strain           | 0.00538       | 0.019368             |
| ubas1_stage:strain     | 6.69E-08      | 8.03E-07             |
| ubas2_stage            | 1.34E-11      | 2.41E-10             |
| ubas2_strain           | 0.00711       | 0.023269091          |
| ubas2_stage:strain     | 6.18E-07      | 4.45E-06             |

**Table S2, related to Figure 5. Table of linear regression *p* values with *FDR* correction for strain and stage comparison of NDMM levels.**

| RS2333                    | dasc#1     | npar#1     | ascr#9     |
|---------------------------|------------|------------|------------|
| 72 hrs compared to 24 hrs | 5.7511E-07 | 3.4672E-05 | 0.00010345 |
| 72 hrs compared to 48 hrs | 0.00571003 | 0.17579174 | 0.19705545 |
| RSC017                    | dasc#1     | npar#1     | ascr#9     |
| 72 hrs compared to 24 hrs | 0.02548973 | 0.00365597 | 0.02028689 |
| 72 hrs compared to 48 hrs | 0.21178072 | 0.36578067 | 0.10414329 |

**Table S3, related to Figure 5. Pairwise comparison of dasc#1, npar#1, and ascr#9 throughout development.**

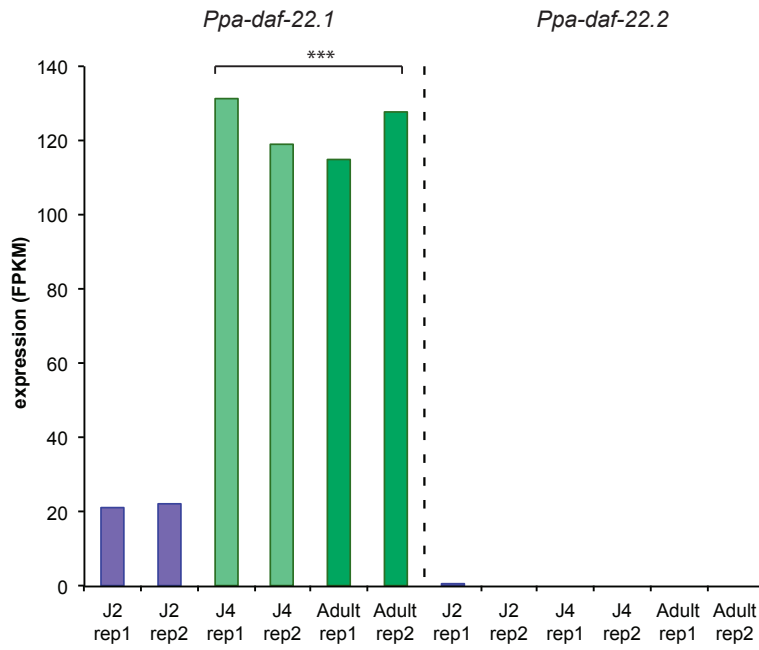

**Figure S6, related to Figure 5. Enzyme that synthesizes NDMMs is transcriptionally regulated during development.**

## Supplemental Figure Legends

### Figure S1, related to Figure 2. Vital dye staining of *Pristionchus pacificus*.

(A) Control *P. pacificus* imaged with Cy3, FITC, and DAPI filters, and a merge with Differential Interference Contrast (DIC). Histogram on the right represents quantification of intensity with each filter. (B) Same as (A) but stained with 0.005% Neutral Red, (C), 50  $\mu$ M CellTracker Green Bodipy (Thermo Fischer), or (D) 50  $\mu$ M CellTracker Blue CMAC Dye (Thermo Fischer). J2s were stained (see Materials and Methods), and ensuing adult animals were imaged 3 days later on a Zeiss Axio Imager 2 with an AxioCam 506 mono, and processed using Zen2 pro software. Image brightness and contrast were enhanced in ImageJ for display, with a minimum displayed value of 10 and maximum of 100 for all images. Note that while Neutral Red and CellTracker Green staining are bright and specific to their respective channels, CellTracker Blue is indistinguishable from background fluorescence.

### Figure S2, related to Figure 2. Vital dye staining of *Caenorhabditis elegans*.

(A-D) Same as Supplementary Figure 1, but with *C. elegans*.

### Figure S3, related to Figure 2. Vital dye staining of *Pristionchus pacificus* dauers, and

**duration of staining.** (A) Control *P. pacificus* dauer imaged with DIC, Cy3, and FITC filters. (B) Dauers stained with either 0.005% Neutral Red or 50  $\mu$ M CellTracker Green Bodipy and imaged immediately after staining with DIC, Cy3, and FITC filters and merged with DIC. Images were taken using Zeiss Axio Imager 2 with an AxioCam 506 mono, processed using Zen2pro software, and adjusted in ImageJ, with a display value minimum of 21 and maximum of 117.

*Werner, et al. Adult influence on juvenile phenotypes by stage-specific pheromone production*

---

(C-G) 50  $\mu$ M Cell Tracker Green Bodipy and 0.005% Neutral Red-stained J2s were imaged every day for five days. Percent of individuals retaining the dyes are shown in panels next to each microscope image for each day. Both stains are seen in all organisms for three days; Neutral Red (NR) persists for at least five, while the number of Green Bodipy (GB) –stained worms drops on day four. All images are merged with DIC, n=31 GB, 63 NR day 1, 68 GB, 56 NR day 2, 50 GB, 50 NR day 3, 50 GB, 50 NR day 4, 50 GB, 50 NR day 5.

**Figure S4, related to Figure 2. Vital dye staining does not affect *P. pacificus* mouth form or development.**

(A) Neutral Red and CellTracker Green Bodipy-stained J2s reach adulthood at the same rate as unstained J2s (3 days). (B) All of the J2s stained retain the dye in adulthood in the intestine. (C) Neither dye affects mouth form; both unstained and stained worms remain 100% St (n=30). (D-F) Same as for (A-C) except with dauers instead of J2s, and only with Neutral Red.

**Table S1, related to Figure 3. Table of binomial regression  $p$  values for vital-dye method and excess crowding.**

Significance  $p$  values from binomial regression of vital-dye method for age and number added, and from binomial regression of number-reaching-adult and Eu counts for each number of individuals added relative to 1,000 individuals added.

**Figure S5, related to Figure 5. Pheromone-profiling quality control.**

(A) Extracted ion traces (width 0.1 m/z) of 11 of the 12 NDMMs used in this publication from a seven-day mixed-stage sample, double peak of 247.12 m/z indicate isomeric structures (Part#9/Ascr#9). (B) Example of an averaged spectrum over a calibration segment, sodium-

formiat cluster building solution has been used to ensure high mass accuracy in each run. (C) Comparison of an endometabolome sample from a seven day mixed-stage cultured compared to the endometabolome of eggs, produced by using bleached eggs from 80 x 60 mm plates.

**Table S2, related to Figure 5. Table of linear regression  $p$  values with FDR corrections for strain and stage comparison of NDMM levels.** FDR-corrected and uncorrected  $p$  values from linear regression of *P. pacificus* NDMMs (alternating grey background between NDMMs for clarity). Red values indicate  $FDR < 0.05$ .

**Table S3, related to Figure 5. Pairwise comparison of dasc#1, npar#1, and ascr#9 throughout development.** Significance assessed with a two-tailed student's  $t$ -test. Red values indicate  $p < 0.05$ .

**Figure S6, related to Figure 5. Enzyme that synthesize NDMMs is transcriptionally regulated during development.** Comparison of *daf-22.1* and *daf-22.2* expression (FPKM) by RNA-seq through different stages of development, data from Baskaran et al., 2015. A two-sided students  $t$ -test was performed between J4-adults and J2s (Significance codes: 0 '\*\*\*\*' 0.001, '\*\*\*' 0.01, '\*\*' 0.05).
